1 TITLE: Target enrichment and extensive population sampling help untangle the recent, rapid  
2 radiation of *Oenothera* sect. *Calylophus*

3  
4 RUNNING HEAD: Cooper et al., Phylogenomics of *Oenothera* sect. *Calylophus*

5  
6 AUTHORS:

7  
8 Benjamin J. Cooper<sup>1,2,\*</sup>, Michael J. Moore<sup>3</sup>, Norman A. Douglas<sup>4</sup>, Warren L. Wagner<sup>5</sup>, Matthew  
9 G. Johnson<sup>1,6</sup>, Rick P. Overson<sup>1,7</sup>, Angela J. McDonnell<sup>1</sup>, Rachel A. Levin<sup>8</sup>, Robert A. Raguso<sup>9</sup>,  
10 Hilda Flores Olvera<sup>10</sup>, Helga Ochoterena<sup>10</sup>, Jeremie B. Fant<sup>1,2</sup>, Krissa A. Skogen<sup>1,2</sup>, Norman J.  
11 Wickett<sup>1,2,\*</sup>

12  
13 <sup>1</sup> The Negaunee Institute for Plant Conservation Science and Action, Chicago Botanic Garden,  
14 1000 Lake Cook Rd., Glencoe, IL 60022, USA

15 <sup>2</sup> Northwestern University, Program in Plant Biology and Conservation, O.T. Hogan Hall, Room  
16 6-140B, 2205 Tech Drive, Evanston, IL 60208, USA

17 <sup>3</sup> Oberlin College, Department of Biology, 119 Woodland St., Oberlin, OH 44074, USA

18 <sup>4</sup> Department of Biology, University of Florida, Gainesville, FL 32611, USA

19 <sup>5</sup> Department of Botany, MRC-166, Smithsonian Institution, PO Box 37012, Washington, DC  
20 20013-7012, USA

21 <sup>6</sup> Department of Biological Sciences, Texas Tech University, Box 43131 Lubbock, TX 79409,  
22 USA

23 <sup>7</sup> School of Sustainability, Arizona State University, PO Box 875502, Tempe, AZ 85287-5502,  
24 USA

25 <sup>8</sup> Department of Biology, Amherst College, 25 East Drive, Amherst, MA, 01002, USA

26 <sup>9</sup> Department of Neurobiology & Behavior, Cornell University, 215 Tower Road, Ithaca, NY  
27 14853, USA

28 <sup>10</sup> Departamento de Botánica, Instituto de Biología, Universidad Nacional Autónoma de México,  
29 Mexico City, Mexico

30  
31 \*Authors for correspondence: [nwickett@chicagobotanic.org](mailto:nwickett@chicagobotanic.org), [benjamin.cooper06@gmail.com](mailto:benjamin.cooper06@gmail.com)

32 ABSTRACT

33 *Oenothera* sect. *Calylophus* is a North American group of 13 recognized taxa in the  
34 evening primrose family (Onagraceae) with an evolutionary history that may include  
35 independent origins of bee pollination, edaphic endemism, and permanent translocation  
36 heterozygosity. Like other groups that radiated relatively recently and rapidly, taxon boundaries  
37 within *Oenothera* sect. *Calylophus* have remained challenging to circumscribe. In this study, we  
38 used target enrichment, flanking non-coding regions, summary coalescent methods, tests for  
39 gene flow modified for target-enrichment data, and morphometric analysis to reconstruct  
40 phylogenetic hypotheses, evaluate current taxon circumscriptions, and examine character  
41 evolution in *Oenothera* sect. *Calylophus*. Because sect. *Calylophus* comprises a clade with a  
42 relatively restricted geographic range, we were able to extensively sample across the range of  
43 geographic and morphological diversity in the group. We found that the combination of exons  
44 and flanking non-coding regions led to improved support for species relationships. We  
45 reconstructed potential hybrid origins of some accessions and note that if processes such as  
46 hybridization are not taken into account, the number of inferred evolutionary transitions may be  
47 artificially inflated. We recovered strong evidence for multiple origins of the evolution of bee  
48 pollination from ancestral hawkmoth pollination, the evolution of edaphic specialization on  
49 gypsum, and permanent translocation heterozygosity. This study applies newly emerging  
50 techniques alongside dense infraspecific sampling and morphological analyses to effectively  
51 address a relatively common but recalcitrant problem in evolutionary biology.

52

53 *Keywords.*– Gypsum Endemism, Onagraceae, *Oenothera* sect. *Calylophus*, Pollinator Shift,  
54 Recent Radiation, Phylogenomics, Target Enrichment

55

## 56 INTRODUCTION

57         The challenges of reconstructing species histories for groups that arose through recent,  
58 rapid radiations are well established. Phylogenetic signal can be obscured by processes such as  
59 incomplete lineage sorting (ILS) and gene flow (Maddison and Knowles 2006; Knowles and  
60 Chan 2008; Christie and Knowles 2015), resulting in short branch lengths and conflicting gene  
61 tree topologies. Consequently, approaches that use few loci or concatenation may fail to resolve  
62 the most accurate species tree (Eckert and Carstens 2008; Leaché et al. 2014; Xi et al. 2014;  
63 Giarla and Esselstyn 2015). This may be particularly common in plants that are thought to have  
64 experienced rapid or recent radiation with ongoing hybridization and high levels of ILS. The  
65 application of target enrichment methods that efficiently sequence hundreds of nuclear loci,  
66 coalescent-based phylogenetic methods that account for ILS and gene flow, and extensive  
67 sampling of morphologically diverse populations across the geographic range should allow for  
68 more accurate representations of phylogenetic relationships (Maddison and Knowles 2006;  
69 Knowles and Chan 2008; Knowles 2009; Mamanova et al. 2010; Lemmon et al. 2012; Straub et  
70 al. 2012; Bryson et al. 2014; Weitemier et al. 2014; Mandel et al. 2014; Stephens et al. 2015;  
71 Johnson et al. 2016).

72         *Oenothera* sect. *Calylophus* currently comprises seven species (thirteen taxa) with a  
73 center of diversity in western Texas, southern New Mexico, and north-central Mexico (Fig. 1;  
74 Towner 1977; Turner and Moore 2014; Wagner 2021). Previous analyses suggest that *Oenothera*  
75 sect. *Calylophus* forms a well-supported, morphologically coherent clade with a relatively  
76 restricted geographic range (Towner 1977; Levin et al. 2004; Wagner et al. 2007; Turner and  
77 Moore 2014; Wagner 2021). However, as with other groups that have experienced rapid

78 radiations, taxon boundaries within *Oenothera* sect. *Calylophus* have been challenging to define,  
 79 likely due to phenomena such as overlapping morphological boundaries, ongoing introgression,  
 80 and incomplete lineage sorting.

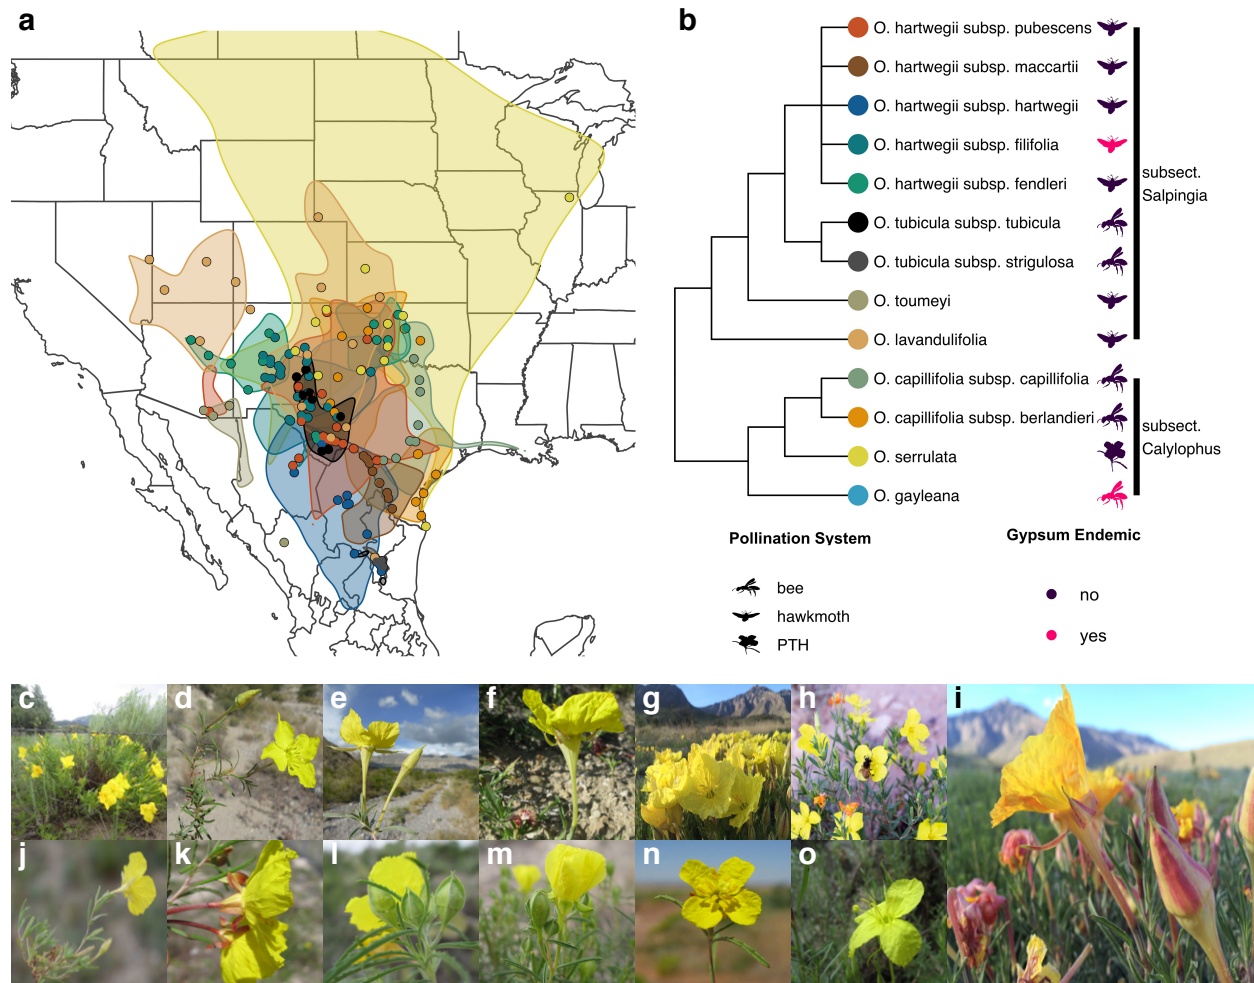

**Figure 1**

81 In the most comprehensive study of the group to date, Towner (1977) circumscribed taxa  
 82 using morphology, breeding system, geography, and ecology, but it was noted (and our field  
 83 observations confirm) that characters often overlap among taxa (Towner 1977). Taxa within  
 84 *Oenothera* sect. *Calylophus* are divided into two easily recognizable subsections: subsect.  
 85 *Salpingia* and subsect. *Calylophus* (Towner 1977; Wagner et al. 2007). Pollination varies



86 between the two subsections; flowers of subsect. *Salpingia* are adapted to vespertine pollination  
87 by hawkmoths, except for *O. tubicula*, which opens in the morning and is primarily pollinated by  
88 bees (Towner 1977), while taxa in subsect. *Calylophus* are predominantly bee-pollinated  
89 (Towner 1977). Taxa in both subsections have geographic ranges that partially (or even largely)  
90 overlap, resulting in occasional morphologically intermediate populations (Towner 1977).  
91 Although confounding for morphological-based analyses, this observed pattern of reticulation is  
92 consistent with a recent, rapid radiation occurring in parallel with climatic fluctuations and  
93 increasing aridity in the region since the Pleistocene (Raven 1964; Towner 1977; Nason et al.  
94 2002; Katinas et al. 2004). Hawkmoth pollination, which is ancestral in Onagraceae and common  
95 in *Oenothera* sect. *Calylophus*, is known to result in long-distance pollen movement (Stockhouse  
96 1973; Skogen et al. 2019). Therefore, gene flow may have been extensive over the evolutionary  
97 history of hawkmoth-pollinated taxa, increasing the chances that processes such as historical  
98 introgression may obscure phylogenetic signal in extant plants (Elrich and Raven 1969). With a  
99 phylogenomic approach that samples hundreds of nuclear loci, we may better illuminate both the  
100 history of these species and the key evolutionary processes related to speciation in this group.

101         Understanding speciation in angiosperms remains a fundamental question in evolutionary  
102 biology (Barrett et al. 1996; Rajakaruna 2004; van der Niet et al. 2006; Wilson et al. 2007;  
103 Crepet and Niklas 2009; Peakall et al. 2010; Xu et al. 2011; Van der Niet and Johnson 2012;  
104 Boberg et al. 2014). *Oenothera* section *Calylophus* has an evolutionary history that likely  
105 involves changes in reproductive system (pollinator functional group, breeding system) and  
106 edaphic endemism. For example, there are thought to be two independent shifts between  
107 pollinators from hawkmoth to bee pollination (Towner 1977; Fig. 1b), despite many studies in  
108 other plant groups showing a directional bias in shifts from bee to hummingbird or hawkmoth

109 pollination (Barrett et al. 1996; Wilson et al. 2007; Thomson and Wilson 2008; Tripp and Manos  
110 2008; Barrett 2013). However, pollinator shifts that do not follow this sequence may be more  
111 likely when the extent of trait divergence and specialization does not completely inhibit  
112 secondary pollinators such as bees, as has been suggested in *Oenothera* sect. *Calylophus*  
113 (Stebbins 1970; Tripp and Manos 2008; Van Der Niet et al. 2014). Shifts to autogamy are also  
114 frequent across angiosperms and in Onagraceae alone there are an estimated 353 shifts to modal  
115 autogamy (i.e. mostly autogamous; Raven 1979). *Oenothera* sect. *Calylophus* also includes at  
116 least one autogamous species, *O. serrulata*, which exhibits permanent translocation  
117 heterozygosity, a phenomenon in which all chromosomes are translocationally heterozygous  
118 (PTH; Towner 1977) (Fig. 1b). While the evolution of PTH has been assessed in molecular  
119 phylogenetic analyses across Onagraceae (Johnson et al. 2009; Hollister et al. 2019), no study to  
120 date has examined this transition in a well-sampled clade with extensive population sampling.  
121 Lastly, abiotic ecological factors such as edaphic specialization are also known to drive  
122 speciation in some groups (Rajakaruna 2004; van der Niet et al. 2006), including in *Oenothera*  
123 sect. *Pachylophus* (Patsis et al. in press). For example, serpentine endemics represent ~10% of  
124 the endemic flora in California even though serpentine soils account for about 1% of terrestrial  
125 habitat in the state (Brady et al. 2005). Similarly, the Chihuahuan Desert is comprised of  
126 numerous isolated islands of gypsum outcrops and current estimates suggest that at least 235 taxa  
127 from 36 different plant families are gypsum endemics (Moore and Jansen 2007; Moore et al.  
128 2014). It is suspected that gypsum endemism has also evolved independently in *Oenothera* sect.  
129 *Calylophus* at least twice (Towner 1977; Turner and Moore 2014; Fig. 1b). Ultimately, to  
130 understand the role that these transitions have played in shaping the diversity of *Oenothera* sect.  
131 *Calylophus*, a robust phylogeny is required.

132 Here, we use target enrichment, summary coalescent methods, and morphometric  
133 analyses to reconstruct a phylogenetic relationships, leveraging this information to re-examine  
134 previous taxonomic concepts, test for instances of hybridization, and resolve the history of  
135 pollinator shifts, PTH, and gypsum endemism in *Oenothera* sect. *Calylophus*. Target enrichment  
136 is a cost-effective method for sequencing hundreds of loci across a high volume of samples,  
137 producing highly informative datasets for phylogenetics (Lemmon et al. 2012; Straub et al. 2012;  
138 Mandel et al. 2014; Weitemier et al. 2014; Heyduk et al. 2015; Stephens et al. 2015; Johnson et  
139 al. 2016). While target enrichment is generally designed to capture coding regions, a significant  
140 proportion of flanking non-coding regions can be recovered (the “splash-zone”; Weitemier et al.  
141 2014). The inclusion of non-coding regions may be particularly informative for recent radiations,  
142 since these regions are less constrained by selective pressures and may contain on average more  
143 informative sites at shallower time scales (Folk et al. 2015). We included these flanking non-  
144 coding regions in our sequence alignments to evaluate their impact on reconstructing lower-order  
145 relationships. Importantly, we sampled extensively, including individuals from numerous  
146 populations across the geographic and morphological ranges of all thirteen taxa in the section  
147 (Fig. 1a). This study presents an example of how combining these molecular techniques with  
148 dense sampling and morphological analysis can be used to effectively address a common  
149 problem in evolutionary biology.

150

## 151 MATERIALS AND METHODS

152 A total of 194 individuals spanning the geographic, morphological, and ecological ranges  
153 of all 13 recognized taxa in *Oenothera* sect. *Calylophus* [following Towner (1977) and Turner  
154 and Moore (2014)] were included in this study (Fig. 1a, S1, S2) along with 8 outgroups

155 representing other major sections of *Oenothera* (*Eremia*, *Gaura*, *Kneiffia*, *Lavauxia*, *Oenothera*,  
156 *Pachylophus*, and *Ravenia*) and other genera (*Chylismia* and *Eulobus*) in Onagraceae (S1, S2).  
157 DNA was extracted from fresh, silica-dried leaf tissue (S3). PTH status was confirmed or  
158 reassessed for individuals in subsect. *Calylophus* by assessing pollen fertility, when flowers were  
159 present, using a modified Alexander stain (Alexander 1969, 1980; S3).

160 Target nuclear loci for enrichment were determined by clustering transcriptome  
161 assemblies of *Oenothera serrulata* (1KP accession *SJAN*) and *Oenothera capillifolia* subsp.  
162 *berlandieri* (1KP accession *EQYT*). Starting with the 956 phylogenetically informative  
163 *Arabidopsis* loci identified by Duarte et al. (2010; S3), we identified 322 homologous, single-  
164 copy loci in our clusters and used these in the probe design process. Libraries were enriched for  
165 these loci using the MyBaits protocol (Arbor Biosciences, Ann Arbor, MI, USA) and sequenced  
166 on an Illumina MiSeq (2 x 300 cycles, v3 chemistry; Illumina, Inc., San Diego, California,  
167 USA). Raw reads have been deposited at the NCBI Sequence Read Archive (BioProject  
168 PRJNA544074; See S3 for details). Reads were trimmed using Trimmomatic (Bolger et al. 2014;  
169 S3) and trimmed, quality-filtered reads were assembled using HybPiper (Johnson et al. 2016).  
170 From the assembled loci, we produced two datasets: “**exons**”, consisting of exon-only  
171 alignments, and “**supercontig**”, consisting of alignments containing both the exon alignment and  
172 flanking non-coding regions (the “splash-zone” per Weitemier 2014 and reconstructed using  
173 supercontigs produced by HybPiper). We used these two datasets to test the most recent  
174 taxonomic circumscription of the group with several methods: (1) phylogenetic inference of  
175 concatenated alignments (two analyses: exons and supercontigs) using RAxML (Stamatakis  
176 2014), (2) ASTRAL-II (Mirarab and Warnow 2015; Sayyari and Mirarab 2016) species tree  
177 inference (two analyses: exons and supercontigs), (3) SVD Quartets (Chifman and Kubatko

178 2014, 2015) species tree inference (one analysis: supercontigs), (4) Phyparts (Smith et al. 2015;  
179 one analysis: supercontigs), (5) IQtree (Minh et al. 2018) with both gene and site concordance  
180 factors (one analysis: supercontigs).

181 We used HyDe (Blischak et al. 2018) to test for putative hybrid origins of selected taxa  
182 and accessions by calculating D-Statistics (Green et al. 2010) for a set of hypotheses (S3). To  
183 further characterize population-level processes or genetic structure within sect. *Calylophus*, we  
184 extracted and filtered SNPs by mapping individual reads against reference supercontigs (see  
185 <https://github.com/lindsawi/HybSeq-SNP-Extraction>) and used Discriminant Analysis of  
186 Principal Components (Jombart et al. 2010) as implemented in the R package *adeigenet* (Jombart  
187 2008) and the *snmf* function in the LEA package (Frichot and François 2015) in R (R Core  
188 Team, 2020; S3).

189 We evaluated current taxonomic concepts and patterns of morphological variation by  
190 measuring character states for vegetative and floral structures that have been used historically to  
191 discriminate taxa in *Oenothera* sect. *Calylophus* (Towner 1977): plant height, leaf length (distal),  
192 leaf width (distal), leaf length/width ratio (distal), leaf length (basal), leaf width (basal), leaf  
193 length/width (basal), sepal length, and sepal tip length (S3). Measurements were made for 125 of  
194 the sequenced samples (S11); we were unable to measure all traits for 73 samples because we did  
195 not have access to the herbarium vouchers, or the trait of interest was not captured on the  
196 voucher, therefore some samples were dropped from the analysis due to missing values. Finally,  
197 the number of transitions and inferred ancestral conditions of reproductive system were mapped  
198 onto an ASTRAL species tree, with individuals grouped into species, using the stochastic  
199 mapping function in the R package *phangorn* version 2.5.5 (Schliep 2011; S3).

200

201 RESULTS AND DISCUSSION

202 *Sequencing and Phylogenetic Results*

203 Sequencing resulted in a total of 80,273,296 pairs of 300-bp reads with an average of  
204 625,323 reads per sample. Following quality filtering, assembly and alignment, we recovered  
205 204 loci that were present in at least 70% of the samples. Across all datasets and analyses,  
206 *Oenothera* sect. *Calylophus* was monophyletic. At the subsection level there was strong  
207 agreement in topology between concatenation and coalescent-based trees. For example, subsect.  
208 *Calylophus* was recovered as sister to *Oenothera* subsect. *Salpingia* (minus *O. toumeyi*) with  
209 strong support across all analyses and *O. toumeyi* [considered by Towner (1977) to be in subsect.  
210 *Salpingia*; Fig. 2, S4-7] was recovered as sister to subsect. *Calylophus* across all trees, with  
211 strong bootstrap support. Within subsect. *Calylophus* there was poor resolution for currently  
212 recognized taxa in all analyses, whereas taxon relationships were better resolved in subsect.  
213 *Salpingia* (Fig. 2, S4-7). With coalescent-based tree reconstruction, most taxa *sensu* Towner  
214 (1977) were recovered as monophyletic with moderate to strong support (Fig. 2, S6-8). In  
215 contrast, both the exon and supercontig concatenation trees recovered most currently recognized  
216 taxa as non-monophyletic (S4, S5). Given that concatenation has been shown to produce  
217 incorrect topologies in the presence of high ILS (Roch and Steel 2015) and that *Oenothera* sect.  
218 *Calylophus* underwent recent radiation, we believe the paraphyly of taxa in both concatenation  
219 trees might be artifactual. We therefore interpret relationships based on our coalescent-based  
220 trees, which comprise the focus for the remainder of the paper (Fig. 2, S6-8).



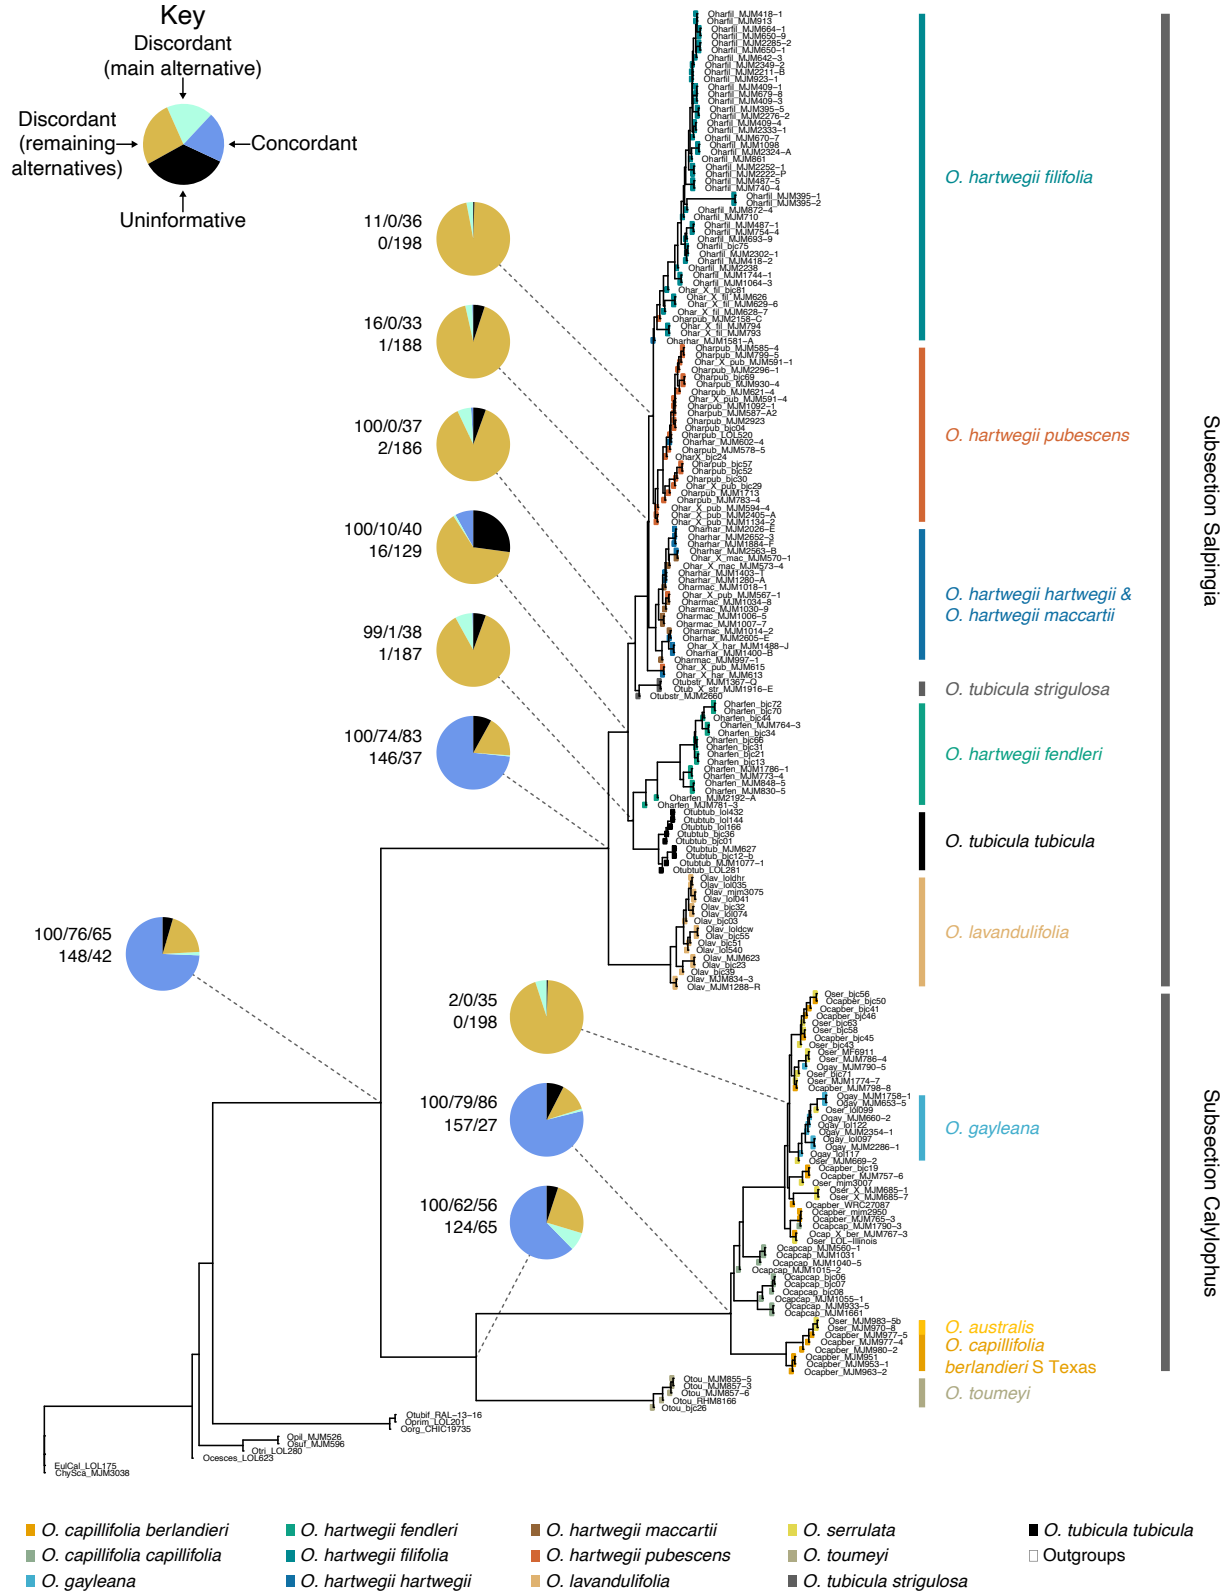

**Figure 2**

221 To understand whether summary coalescent relationships display a consistent signal  
222 across the genome, we quantified gene tree and site concordance using Phyparts and IQtree. We  
223 found that gene tree concordance was highest at the deepest nodes at the species level where we  
224 expected less ILS and more time between speciation events (Fig. 2, S8, S9). Correspondingly,  
225 gene tree concordance was lowest at the subspecies level where increased sharing of ancestral  
226 alleles and ongoing gene flow are more likely (Fig. 2, S8, S9). For example, within *O. hartwegii*  
227 less than 1% of genes were concordant for bifurcations representing all currently recognized taxa  
228 at the subspecies level (Fig. 2, S8, S9). For species-level nodes with high support and high gene  
229 tree concordance, site concordance was also high; for example, *O. lavandulifolia* had high  
230 bootstrap support in summary coalescent trees (BS = 100), high gene tree concordance (Phyparts  
231 = 94% concordance, gCF = 74), and high site concordance (sCF = 83; Fig. 2, S9h). For  
232 subspecies with high support, but low gene tree concordance, site concordance was moderate.  
233 For example *O. hartwegii* subsp. *fendleri* had high bootstrap support (BS = 99), low gene tree  
234 concordance (Phyparts = <1% concordance, gCF = 1), and moderate site concordance (sCF = 38;  
235 Fig. 2, S9b). For subspecies that were monophyletic in our coalescent-based trees, but that had  
236 low support and low gene tree concordance, site concordance was moderate with an average of  
237 35% of sites in agreement for taxa at these nodes (S9[c,f,g,v]). For example *O. hartwegii* subsp.  
238 *filifolia* had low bootstrap support, low gene tree concordance (Phyparts = <1% concordance,  
239 gCF = 0), and moderate site concordance (sCF = 36; Fig. 2, S9c). This is an important finding  
240 because while species tree relationships can be obscured by ILS, site concordance factors, which  
241 may be less constrained and less subject to ILS at shallower evolutionary timescales, provide a  
242 key alternative method of support (Minh et al. 2018).

243 In general, topologies of exon and supercontig datasets were similar, with no major  
244 differences in clade membership, but the inclusion of the flanking non-coding regions increased  
245 support at shallow nodes in our trees. However, this trend was not universal. For example, in  
246 subsect. *Salpingia*, using the supercontig dataset decreased support slightly for one taxon (*O.*  
247 *hartwegii* subsp. *filifolia*), and in subsect. *Calylophus* it led to paraphyly of another (*O.*  
248 *capillifolia* subsp. *capillifolia*). For six other taxa, our results showed that using supercontigs  
249 increased bootstrap support. Therefore, these results demonstrated a net benefit of including  
250 flanking non-coding regions for resolving relationships among closely related taxa.

251

#### 252 *Hybridization and Geneflow*

253 Using concatenated loci from the supercontig dataset, we used HyDe (Blischak et al.  
254 2018) to test for signals of hybridization. We used 552,521 sites and tested 22 hypotheses for  
255 either individuals or groups suspected to be of hybrid origin based on field observations of  
256 morphological intermediacy, geographic location, and topological position in our coalescent-  
257 based trees and found evidence of hybridization in three individuals representing two taxa, both  
258 in subsect. *Salpingia*. The highest signal of hybridization, with a gamma value ( $\hat{\gamma}$ ) of 0.947  
259 suggesting more historic gene-flow, was observed in one of three sampled individuals of *O.*  
260 *tubicula* subsp. *strigulosa* (*MJM1916.E*). This involved admixture between *O. tubicula* subsp.  
261 *tubicula* and the clade consisting of *O. hartwegii* subsp. *hartwegii* and *O. hartwegii* subsp.  
262 *maccartii* (Z-score = 5.585, p-value = 0.000,  $\hat{\gamma}$  = 0.947; Fig. 3a, S10). We also detected  
263 significant levels of hybridization, with  $\hat{\gamma}$  ranging from 0.332 to 0.338 suggesting more  
264 contemporary gene-flow, in two individuals in *O. hartwegii* subsp. *pubescens*, *BJC29* (Z-score =  
265 2.378, p-value = 0.009,  $\hat{\gamma}$  = 0.338) and *MJM594* (Z-score = 2.094, p-value = 0.018,  $\hat{\gamma}$  = 0.332).

266 This more recent gene flow involved admixture between *O. hartwegii* subsp. *pubescens* and the  
267 clade consisting of *O. hartwegii* subsp. *hartwegii* and *O. hartwegii* subsp. *maccartii* (Fig. 3a,  
268 S10).

269 The finding that one individual of *O. tubicula* subsp. *strigulosa* may be of hybrid origin is  
270 consistent with gene flow between *O. tubicula* subsp. *strigulosa* and its sister taxon *O. tubicula*  
271 subsp. *tubicula* (sensu Towner 1977). In our coalescent-based analyses, the two subspecies of *O.*  
272 *tubicula* were not recovered as sister taxa, and this relationship was strongly supported (S9[j-k]).  
273 If the two *O. tubicula* taxa arose independently, this would support the hypothesis that bee  
274 pollination arose in *Oenothera* sect. *Calylophus* independently three times. However, while the  
275 summary coalescent analyses we utilized to estimate phylogenies accounted for ILS in tree  
276 estimation, they did not account for gene flow (Meng and Kubatko 2009; Gerard et al. 2011;  
277 Kubatko and Chifman 2019). Our HyDe results may support the hypothesis that *O. tubicula*  
278 subsp. *strigulosa* has experienced gene flow from two closely related taxa, and may have hybrid  
279 origins resulting from crossing between *O. tubicula* subsp. *tubicula* and *O. hartwegii* subsp.  
280 *hartwegii* (Fig. 3a, S10). This is consistent with Towner's interpretation of this taxon, which he  
281 hypothesized may represent a stabilized derivative of introgression between *O. tubicula* subsp.  
282 *tubicula* and *O. hartwegii* subsp. *hartwegii* (Towner 1977). Therefore, the placement of *O.*  
283 *tubicula* subsp. *strigulosa* as sister to the rest of the *O. hartwegii* species complex in our trees  
284 may result from past gene flow and hence may not represent independent origins of bee  
285 pollination in subsect. *Salpingia*. These results underscore the importance of explicitly including  
286 tests for hybridization in phylogenetic studies. In the case of these data, estimating a species tree  
287 given a set of gene trees within a coalescent framework without considering other non-ILS  
288 sources of signal conflict could artificially inflate the number of inferred evolutionary transitions.

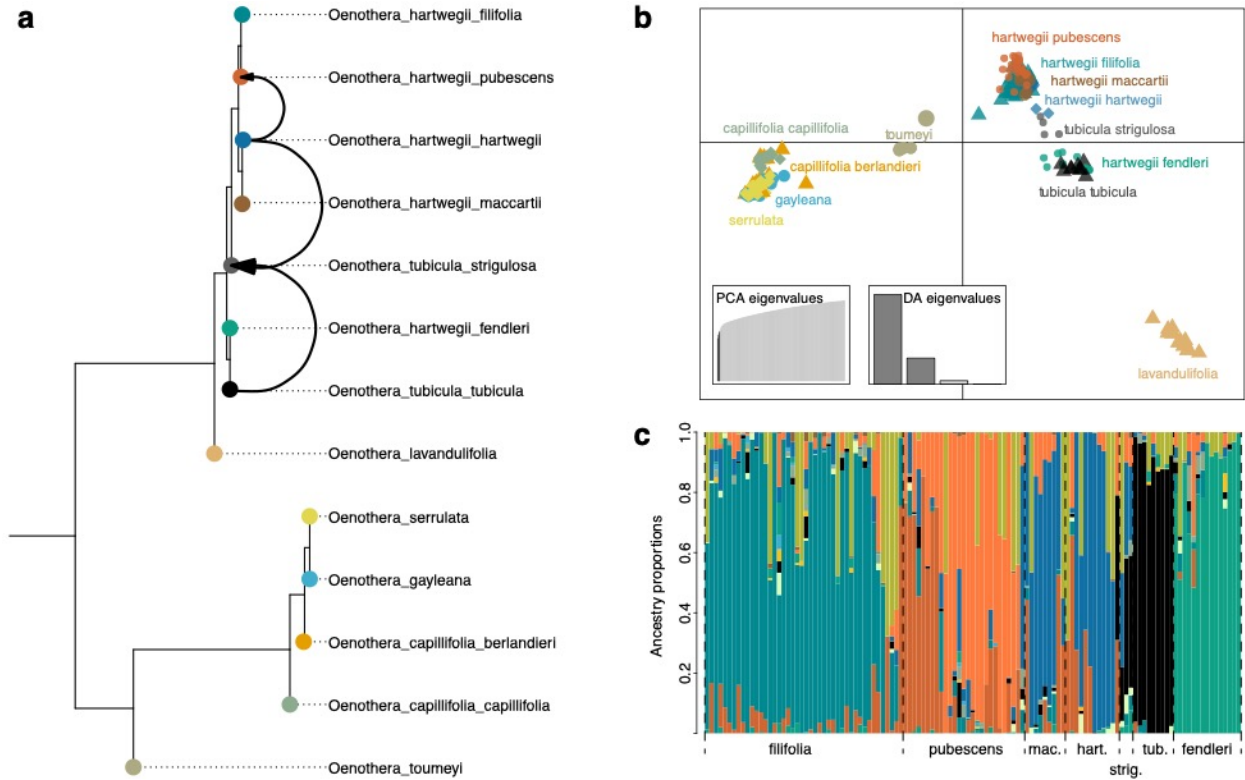

**Figure 3**

289 Our HyDe results also suggest that at least some of the morphological intermediacy and  
 290 overlap among taxa in the group is due to continued, or at least recent, gene flow. For example,  
 291 both *O. hartwegii* subsp. *pubescens* individuals that are inferred to have significant levels of  
 292 admixture were collected from morphologically intermediate populations of *O. hartwegii* subsp.  
 293 *pubescens* and *O. hartwegii* subsp. *hartwegii*. In addition, *O. hartwegii* subsp. *hartwegii* was a  
 294 parent in all three hybridization events (S10). Thus, gene flow may explain this taxon's non-  
 295 monophyly in our summary coalescent results. However, despite the often confounding patterns  
 296 of overlapping morphological variation among closely related taxa in subject. *Salpingia*, this  
 297 pattern does not necessarily appear to be the result of admixture, as many of the tests for  
 298 hybridization based on field observations were not significant (Fig 3a, S10). What is also clear  
 299 from these results is that much like collecting hundreds of nuclear genes provides a more

300 nuanced picture of phylogenetic signal and taxon relationships, our results show that collecting  
301 multiple individuals from across the geographic and morphological ranges is necessary for a  
302 more complete picture of relationships among closely related taxa.

303         After filtering, we extracted a set of 9,728 single nucleotide polymorphisms (SNPs) from  
304 both coding and non-coding regions. A Discriminant Analysis of Principal Components (DAPC;  
305 Fig. 3b) using these data clearly distinguishes *Oenothera* subsect. *Salpingia* from *O.* subsect.  
306 *Calylophus*, with *O. toumeyi* intermediate between the two, which is consistent with the  
307 phylogenetic results presented here. Additionally, the DAPC identifies *O. lavandulifolia* as a  
308 distinct genetic cluster from the remaining taxa in subsection *Salpingia*. The overlap between  
309 taxa, for example between the remaining taxa in subsection *Salpingia*, is consistent with the high  
310 levels of gene tree discordance identified by PhyParts (Fig. 3a). For this latter group of taxa, we  
311 computed estimates of ancestry coefficients using snmf, which suggests a substantial amount of  
312 shared ancestral polymorphisms while also showing some evidence of clear genetic structure  
313 among taxa (Fig. 3c). Consistent with the phylogenetic analyses, there does not appear to be any  
314 clear genetic distinction between *O. hartwegii* subsp. *hartwegii* and *O. hartwegii* subsp.  
315 *maccartii*, whereas *O. hartwegii* subsp. *fendleri*, *O. tubicula* subsp. *tubicula*, and *O. hartwegii*  
316 subsp. *filifolia* appear to be largely distinct.

317

### 318 *Morphological Analysis*

319         We conducted morphometric Principal Components Analysis (PCA) to determine if  
320 morphological patterns were consistent with phylogenetic results and to examine if specific  
321 characters could be used to diagnose taxa as circumscribed by our phylogenetic analysis. Towner  
322 (1977) observed overlapping and confounding patterns of morphological variation among taxa



323 within subsections, particularly within the *O. hartwegii* species complex. Despite this, because  
 324 some taxa (e.g., *O. hartwegii* subsp. *fendleri*) were strongly supported by our summary  
 325 coalescent trees we expected that they would be well distinguished in morphometric analysis.

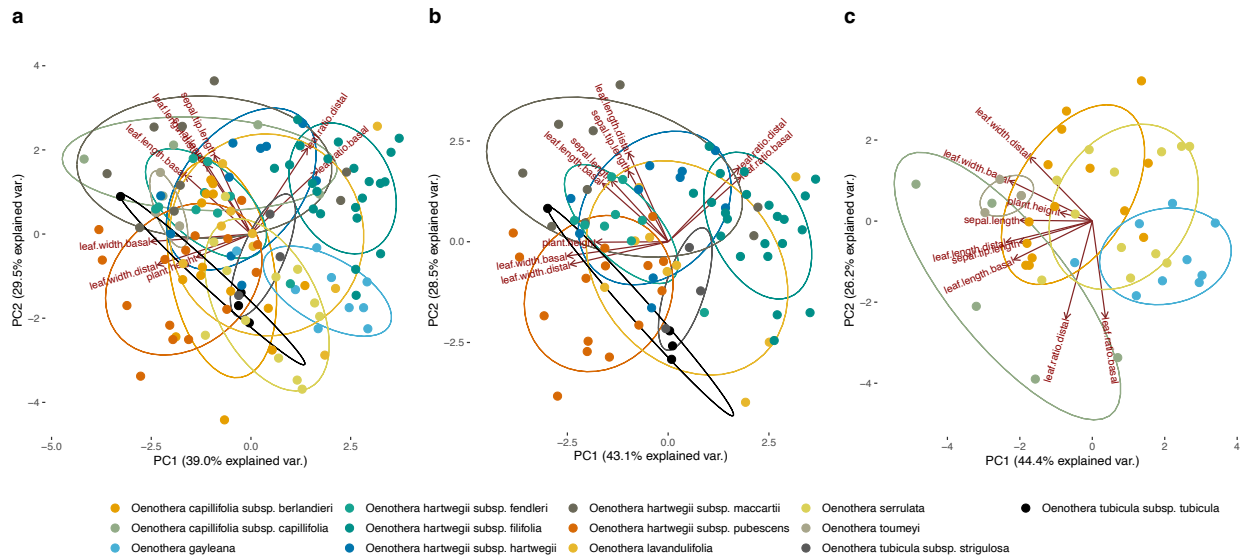

**Figure 4**

326 The main traits that separated taxa in subsect. *Salpingia* were leaf traits and plant size, while  
 327 in subsect. *Calylophus* the main traits that separated taxa were sepal traits. In subsect. *Salpingia*,  
 328 PC1 accounted for 43.1% of variance in PCA, while PC2 accounted for 28.5% (Fig. 4b).  
 329 Morphological characters most associated with PC1 were leaf width (distal and basal), plant  
 330 height, and leaf length/width ratio (distal and basal). Those associated with PC2 were leaf length  
 331 (distal and basal), sepal length, and sepal tip length (Fig. 4b). In subsect. *Calylophus*, PC1  
 332 accounted for 44.4% of explained variance and PC2 accounted for 26.2% (Fig. 4c). The  
 333 characters most associated with PC1 in subsect. *Calylophus* include leaf length (distal and basal),  
 334 sepal length, and sepal tip length. Those most associated with PC2 were leaf length/width ratio  
 335 (distal and basal) and distal leaf width (Fig. 4c).

336 Our results support Towner's understanding of taxon boundaries by underscoring previous  
337 difficulties in identifying individuals in this group based on morphology (Towner 1977). We  
338 found substantial overlapping morphological variation among currently recognized taxa in both  
339 subsections, though some taxa exhibited better grouping than others. The amount of overlap  
340 between taxa was not a function of the strength of tree support for a given taxon in our summary  
341 coalescent results. For example, *O. hartwegii* subsp. *fendleri*, a taxon that was well supported in  
342 our summary coalescent trees, exhibited some of the highest degree of overlap with other taxa in  
343 PCA space. Conversely, both *O. hartwegii* subsp. *filifolia* and *O. hartwegii* subsp. *pubescens*,  
344 two taxa that formed poorly supported clades in our trees, formed clusters on the outer edges of  
345 PCA space and had less overlap than other taxa (Fig. 4b). Interestingly, *O. hartwegii* subsp.  
346 *hartwegii*, the taxon that was identified as a parent in all three instances of admixture in our  
347 HyDe analysis, also overlaps morphologically with most other taxa in subsect. *Salpingia* (Fig.  
348 4b). This is not surprising given that it is widely distributed in northern Mexico and western  
349 Texas and frequently comes into contact with related taxa resulting in sympatric populations and  
350 occasional morphologically intermediate populations.

351

### 352 *Implications for Reproductive Systems and Edaphic Endemism*

353 Our results show that shifts from hawkmoth to bee pollination likely occurred twice in  
354 sect. *Calylophus* (S3) and thus may be more common in *Oenothera* than previously thought. The  
355 strongly supported sister relationship of *O. toumeyi* to remaining subsect. *Calylophus* in our  
356 summary coalescent results is consistent with two independent shifts to bee pollination, once in  
357 the ancestor of subsect. *Calylophus*, and another in subsect. *Salpingia* on the branch leading to  
358 *O. tubicula* (Fig. 2). Independent shifts to bee pollination from hawkmoth pollination are perhaps

359 not surprising considering that within sect. *Calyophus*, hawkmoth-pollinated floral forms exhibit  
360 variation between populations in hypanthium length and diameter and do not prevent occasional  
361 pollination by bees (Lewis 2015; Towner 1977). Hawkmoth-pollinated taxa in sect *Calylophus*  
362 exhibit vespertine anthesis, which separates them temporally from diurnal bees, but variation in  
363 the timing of anthesis is also common between populations (Towner 1977), and hawkmoths are  
364 documented to vary greatly in abundance spatiotemporally (Miller 1981; Campbell et al. 1997;  
365 Artz et al. 2010). In cases of pollen limitation, night-blooming plants benefit from bimodal  
366 pollination between moths and bees by acquiring pollinator assurance against yearly variation or  
367 local extinction of specific pollinators, as shown for other *Oenothera* species (Barthell and  
368 Knops 1997; Artz et al. 2010), *Lonicera japonica* (Miyake and Yahara 1998) and for night-  
369 blooming *Ancistrophora* cacti (Schlumpberger et al. 2009).

370         Additionally, it has been shown that florivore-mediated selection drives floral trait shifts  
371 in sect. *Calylophus* towards bee-pollinated floral forms (Jogesh et al. 2017; Bruzzese et al. 2019).  
372 Variation in reproductive traits that allows some continued pollination by bees provides an  
373 alternative mode of pollen transfer and may represent a mechanism for ensuring pollination.  
374 While studies have shown that pre mating barriers contribute greatly to reproductive isolation  
375 (Stanton et al. 2016), our results show that multiple, independent shifts from hawkmoth to bee  
376 pollination and associated morphological changes, such as the shorter floral tube length of bee  
377 pollinated flowers, may occur in sect. *Calylophus*, and hence may not be a particularly reliable  
378 character for diagnosing taxa in this group.

379         Stochastic mapping (supplemental) suggests that there are multiple origins of permanent  
380 translocation heterozygosity (PTH) in sect. *Calylophus* While ring chromosomes are common  
381 and found in all taxa in sect. *Calylophus*, PTH is currently known from only one taxon, *O.*

382 *serrulata*. Because neighboring populations of *O. serrulata* and its putative progenitor *O.*  
383 *capillifolia* subsp. *berlandieri* often resemble each other phenetically, Towner (1977)  
384 hypothesized that *O. serrulata* may have originated multiple times through independent origins  
385 of translocation heterozygosity in different geographic regions, and may be best recognized as “a  
386 complex assemblage of populations having a common breeding system.” However, this has  
387 never before been explored in a phylogenetic context, nor has it been clearly demonstrated with  
388 phylogenetic studies in Onagraceae. In our summary coalescent trees, all currently recognized  
389 taxa in subsect. *Calylophus* were paraphyletic and *O. serrulata* was scattered throughout the  
390 subsection (Fig. 2, S6, S7). Although support values are not always high for the positions of  
391 various individuals of *O. serrulata*, there is at least one well defined, well supported split among  
392 populations of *O. serrulata*. In our summary coalescent trees, the two *O. serrulata* accessions  
393 from south Texas (*MJM970* & *MJM983*) grouped with other south Texas populations of *O.*  
394 *capillifolia* subsp. *berlandieri* with generally strong support (Fig. 2, S6, S7). This relationship  
395 was supported in PCA space as well, where *MJM983* was morphologically more similar to the  
396 south Texas *O. capillifolia* subsp. *berlandieri* accessions than to other *O. serrulata* (Fig 4C). Our  
397 results are therefore consistent with an independent origin of PTH in coastal Texas populations  
398 of *O. serrulata*, demonstrating at minimum two origins of PTH (see *Taxonomic Implications*  
399 below). However we cannot rule out other independent origins of PTH. Given the prevalence of  
400 translocations among partial sets (i.e. not all seven) of homologous chromosomes in *O.* section  
401 *Calylophus* (Towner 1977), and if this could be considered an intermediate step towards  
402 “complete” PTH, perhaps it is not surprising to reconstruct multiple origins. Our results suggest  
403 that a more complete assessment of the extent and distribution of this phenomenon in section  
404 *Calylophus* is needed.

405           Independent origins of gypsum endemism in sect. *Calylophus* are also supported by our  
406 analyses (supplemental). Edaphic specialization is a fundamental driver of speciation in plants  
407 and contributes greatly to endemism and species diversity in areas with geologically distinct  
408 substrates such as gypsum and serpentine outcrops (Kruckeberg 1984; Anacker et al. 2011;  
409 Cacho and Strauss 2014; Moore et al. 2014). To date, two gypsum endemic taxa have been  
410 described in sect. *Calylophus*, one in each subsection: *O. hartwegii* subsp. *filifolia*, which is  
411 relatively widespread on gypsum in New Mexico and trans-Pecos Texas and only rarely  
412 sympatric with other taxa, and the recently described *O. gayleana*, which is found in  
413 southeastern New Mexico and adjacent western Texas, with disjunct populations in northern  
414 Texas and western Oklahoma (Turner and Moore 2014). Despite low support and low gene tree  
415 congruence in our analyses, the two gypsum endemic taxa had moderate sCF support (Fig. 2,  
416 S9), much like other taxa with similarly low support and high levels of discordance. In  
417 addition, while both gypsum endemics overlapped with other taxa in the morphometric analysis,  
418 they occupied morphological extremes in PCA space (Fig. 4). Given that other well-supported  
419 taxa also overlap morphologically, it is perhaps not surprising that the two gypsum endemic taxa  
420 are not more differentiated from other taxa morphologically. Perhaps the strongest evidence in  
421 our data for their recognition as distinct taxa is that we found no evidence of admixture between  
422 either of these gypsum endemic taxa and other closely related taxa (Fig. 3a, S10).

423

#### 424 *Taxonomic Implications*

425           The most consequential taxonomic result that arises from our analyses is the position of  
426 *O. toumeyi*, a member of subsect. *Salpingia* as circumscribed by Towner (1977). In the present  
427 study, this species is resolved as sister to subsect. *Calylophus* with strong support, rendering

428 subsect. *Salpingia* paraphyletic (Fig. 2, S9). Towner (1977) grouped *O. toumeyi* with *O.*  
429 *hartwegii* due to similar floral and bud characters including large flowers and long floral tubes  
430 suggestive of hawkmoth pollination, and rounded buds with long, free sepal-tips. Because the  
431 breeding system is a defining difference in the current circumscription between the two  
432 subsections in sect. *Calylophus*, this result supports abandoning subsections altogether in sect.  
433 *Calylophus*.

434         Within subsect. *Salpingia* our results also suggest the need for revision. While our  
435 phylogenetic analyses strongly support the current circumscription of *O. lavandulifolia* (sensu  
436 Towner 1977) as a distinct species within subsect. *Salpingia* (Fig. 2, S9), the relationships of the  
437 other two species *O. hartwegii* and *O. tubicula* are less clear. Towner (1977) differentiated these  
438 two species by the breeding system and grouped the five subspecies of *O. hartwegii* together  
439 based on a pattern of reticulate and intergrading variation in which taxa were distinguished from  
440 one another by often slight differences in pubescence and leaf shape. Our morphometric analysis  
441 confirmed this pattern; however, our phylogenetic results indicated that one taxon, *O. hartwegii*  
442 subsp. *fendleri*, shares a closer relationship with the bee pollinated *O. tubicula* subsp. *tubicula*  
443 than other taxa in the hawkmoth pollinated *O. hartwegii* species complex (Fig. 2, S6, S7). This  
444 relationship was strongly supported and renders *O. hartwegii*, according to the current  
445 circumscription, paraphyletic (Towner 1977). Based on strong phylogenetic support for this  
446 clade, and its strong morphological distinctiveness as described by Towner (1977), we suggest  
447 that *O. hartwegii* subsp. *fendleri* be elevated to the species rank along with both subspecies of *O.*  
448 *tubicula* which were equally well supported in phylogenetic analysis and are geographically  
449 isolated. Furthermore, our results support a the possible elevation to species rank for *O.*  
450 *hartwegii* subsp. *filifolia*. While this taxon was poorly supported in our summary coalescent trees



451 (Fig. 2, S6, S7), we found no evidence of hybridization between this taxon and other closely  
452 related taxa. In addition, *O. hartwegii* subsp. *fillifolia* is restricted to gypsum. Therefore, we  
453 believe that the ecological distinctiveness and lack of gene flow of *O. hartwegii* subsp. *fillifolia*  
454 with other taxa in the *O. hartwegii* species complex warrants its elevation as a distinct species. In  
455 light of these changes, and to maintain consistency in classification in the subsection, we feel  
456 that despite the evidence of hybridization of *O. hartwegii* subsp. *pubescens* with *O. hartwegii*  
457 subsp. *hartwegii*, it possesses a morphological distinctiveness that is supported by our  
458 phylogenetic results. We therefore recommend *O. hartwegii* subsp. *pubescens* be elevated to the  
459 species level, while *O. hartwegii* subsp. *hartwegii* and *O. hartwegii* subsp. *maccartii* be retained  
460 as is, forming a polytypic species with two subspecies.

461 In contrast to the relatively clear divisions among taxa in subsect. *Salpingia*, none of the  
462 four currently recognized taxa in the subsect. *Calylophus* were consistently recovered as  
463 monophyletic. For example, *O. capillifolia* subsp. *capillifolia* was monophyletic in our exon-  
464 only summary coalescent tree, but not in the “supercontig” tree, and *O. capillifolia* subsp.  
465 *berlandieri* and *O. serrulata* were scattered throughout sect. *Calylophus* in both trees, perhaps  
466 suggesting widespread gene flow and/or multiple origins of PTH (Fig. 2, S6). Importantly, our  
467 results suggest that the circumscription of *O. gayleana* sensu Turner and Moore (2014) should be  
468 amended. Specifically, we find that the populations of subsect. *Calylophus* from northern Texas  
469 and western Oklahoma that were assigned to *O. gayleana* by Turner and Moore (2014; *MJM790-*  
470 *5, BJC71*) may instead may belong to *O. serrulata* based on both their phylogenetic positions  
471 (Fig. 2, S6, S7) and reduced pollen fertility (S12). These north Texas/western Oklahoma  
472 populations seem to represent slightly narrower-leaved individuals of *O. serrulata*, which is a

473 common inhabitant of the extensive gypsum outcrops of this area (although it is not restricted to  
474 gypsum there).

475 Finally, our results highlight an unrecognized cryptic taxon within *O. capillifolia* formed  
476 by southern Texas coastal populations currently recognized as *O. capillifolia* subsp. *berlandieri*.  
477 Towner (1977) described *O. capillifolia* as a polytypic species with two well-differentiated  
478 morphological races. Though he noted the geographic and cytological distinction of the southern  
479 Texas coastal populations of *O. capillifolia* subsp. *berlandieri*, these populations were included  
480 in *O. capillifolia* subsp. *berlandieri* primarily because of completely overlapping morphological  
481 variation. In our results, this cryptic clade of southern Texas coastal populations of *O. capillifolia*  
482 subsp. *berlandieri* is the most phylogenetically well supported clade in subsect. *Calylophus* and  
483 therefore may warrant taxonomic distinction based on our data (Fig. 2, S9r). Similarly, the  
484 southern Texas coastal populations of *O. serrulata*, which is likely an independent origin of PTH  
485 derived from this cryptic southern Texas coastal clade of *O. capillifolia* subsp. *berlandieri*, are  
486 ecologically distinctive and geographically disjunct from other *O. serrulata* (occurring in coastal  
487 dunes, unlike other populations in western Texas, Oklahoma, and northern Texas). In the past  
488 they were considered distinctive enough to be described as a species, *Calylophus australis*  
489 (Towner & Raven 1970). However, Towner (1977) later combined this species with *O. serrulata*  
490 based on his decision to treat all PTH populations as *O. serrulata*. Combined with our results  
491 here and the ecogeographic distinctiveness consistent with an independent origin of PTH in  
492 coastal Texas, we believe this taxon also warrants recognition as a second PTH species in  
493 *Oenothera* sect. *Calylophus*.

494

495 CONCLUSIONS

496 Here we describe a robust example of resolving a recent, rapid radiation using multiple  
497 sources of evidence: (1) extensive sampling from populations throughout the geographic and  
498 morphological range, (2) target enrichment for hundreds of nuclear genes, (3) the inclusion of  
499 flanking non-coding regions, (4) gene tree-based hybridization inference, (5) SNPs extracted  
500 from target enrichment data, and (6) morphometrics. Our results indicate that in recently radiated  
501 species complexes with low sequence divergence and/or high levels of ILS that could be an  
502 intractable problem with traditional loci, the use of targeted enrichment in addition to flanking  
503 non-coding regions provides a net benefit and is essential to recover species-level resolution. Our  
504 results also underscore the importance of summary coalescent methods and evaluating gene tree  
505 discordance for resolving historical relationships in recalcitrant groups. By explicitly testing for  
506 hybridization using gene tree approaches, we also demonstrate that the estimated number of  
507 character state transitions may be artifactually inflated if hybridization is not taken into account.  
508 This, in combination with morphometrics, provided key evolutionary insights where  
509 relationships in summary coalescent methods may be obscured by gene flow. Importantly, our  
510 study uncovers strong evidence for multiple origins of biologically important phenomena,  
511 including the evolution of bee pollination, PTH, and edaphic specialization. Consequently,  
512 *Oenothera* sect. *Calylophus* might represent a powerful system for understanding these  
513 phenomena, especially with future genome sequence data.

514

#### 515 DATA AVAILABILITY

516 Illumina reads generated for this study are available at the NCBI Sequence Read Archive under  
517 BioProject PRJNA544074. Assembled exon and supercontig sequences, multiple sequence  
518 alignments, and SNP files are available at [http://dx.doi.org/10.5061/dryad.\[NNNN\]](http://dx.doi.org/10.5061/dryad.[NNNN]).

519

## 520 ACKNOWLEDGEMENTS

521 Material for *O. serrulata* and *O. capillifolia* subsp. *berlandieri* that were used for designing  
522 probes for target enrichment (1KP accession codes SJAN and EQTY, respectively) was  
523 originally collected by R.A.R.; samples were grown, and RNA was extracted, in the lab of M.  
524 Johnson and subsequently sequenced by the One Thousand Plant Transcriptomes (1KP)  
525 initiative. We thank the following for access to field sites and permission to collect samples: U.S.  
526 Bureau of Land Management (Colorado, New Mexico, Utah), U.S.D.A. Forest Service (Regions  
527 2, 3, and 4), Carlsbad Caverns National Park, Guadalupe Mountains National Park, Big Bend  
528 National Park, Palo Duro State Park, and White Sands Missile Range. We thank the Billie L.  
529 Turner Plant Resources Center at the University of Texas at Austin for access to herbarium  
530 collections, and we thank the following persons for help with collections: David Anderson,  
531 George S. Hinton, Nidia Mendoza Díaz, Patrick Alexander, Christopher Martine, Rebecca  
532 Drenovsky, Clare Muller, Jeffrey Sanders, Anna Brunner, Joseph Charboneau, Heather-Rose  
533 Kates, and Sophia Weinmann. Finally, we thank Elliot Gardner for providing invaluable advice  
534 during target enrichment and sequencing, and Daniel Bruzzese for help with collections and for  
535 designing the flower silhouette used to signify PTH in figure 1 (available at [www.phylopic.org](http://www.phylopic.org)).

536

## 537 FUNDING SOURCES

538 This work was supported by National Science Foundation grants DEB-1342873 to KAS, JBF,  
539 and NJW, and DEB-1054539 to MJM. Additional support was provided by the National  
540 Geographic Society, Oberlin College, the Nauganee Institute of the Chicago Botanic Garden,

541 The Shaw Fellowship, New Mexico Native Plant Society, American Society of Plant  
542 Taxonomists, and the Society of Herbarium Curators.

543  
544 REFERENCES

- 545  
546 Alexander M.P. 1969. Differential Staining of Aborted and Nonaborted Pollen. *Stain Technol.*  
547 44:117–122.  
548 Alexander M.P. 1980. A Versatile Stain for Pollen Fungi, Yeast and Bacteria. *Stain Technol.*  
549 55:13–18.  
550 Anacker B.L., Whittall J.B., Goldberg E.E., Harrison S.P. 2011. Origins and consequences of  
551 serpentine endemism in the California flora. *Evolution (N. Y.)*. 65:365–376.  
552 Artz D.R., Villagra C. A., Raguso R. A. 2010. Spatiotemporal variation in the reproductive  
553 ecology of two parapatric subspecies of *Oenothera cespitosa* (Onagraceae). *Am. J. Bot.*  
554 97:1498–510.  
555 Barrett S., Harder L., Worley A. 1996. The comparative biology of pollination and mating in  
556 flowering plants. *Philos. Trans. R. Soc. B Biol. Sci.* 351:1271–1280.  
557 Barrett S.C.H. 2013. The evolution of plant reproductive systems: how often are transitions  
558 irreversible? *Proc R Soc B.* 280:20130913.  
559 Barthell J. F., Knops J. M. 1997. Visitation of evening primrose by carpenter bees: evidence of  
560 a "mixed" pollination syndrome. *Southwest. Nat.* 86-93.  
561 Blischak P.D., Chifman J., Wolfe A.D., Kubatko L.S. 2018. HyDe: A python package for  
562 genome-scale hybridization detection. *Syst. Biol.* 67:821–829.  
563 Boberg E., Alexandersson R., Jonsson M., Maad J., Ågren J., Nilsson L.A. 2014. Pollinator  
564 shifts and the evolution of spur length in the moth-pollinated orchid *Platanthera bifolia*.  
565 *Ann. Bot.* 113:267–275.  
566 Bolger A.M., Lohse M., Usadel B. 2014. Trimmomatic: A flexible trimmer for Illumina  
567 sequence data. *Bioinformatics.* 30:2114–2120.  
568 Brady K.U., Kruckeberg A.R., Bradshaw H.D. 2005. Evolutionary ecology of plant adaptation to  
569 serpentine soils. *Annu. Rev. Ecol. Evol. Syst.* 36:243–266.  
570 Bruzese D.J., Wagner D.L., Harrison T., Jogesh T., Overson R.P., Wickett N.J., Raguso R.A.,  
571 Skogen K.A. 2019. Phylogeny, host use, and diversification in the moth family Momphidae  
572 (Lepidoptera: Gelechioidea). *PLoS One.* 14:e0207833.  
573 Bryson R.W., Linkem C.W., Dorcas M.E., Lathrop A., Jones J.M., Alvarado-Díaz J., Grünwald  
574 C.I., Murphy R.W. 2014. Multilocus species delimitation in the *Crotalus triseriatus* species  
575 group (serpentes: Viperidae: Crotalinae), with the description of two new species. *Zootaxa.*  
576 3826:475–496.  
577 Cacho N.I., Strauss S.Y. 2014. Occupation of bare habitats, an evolutionary precursor to soil  
578 specialization in plants. *Proc. Natl. Acad. Sci.* 111:15132–15137.  
579 Campbell D.R., Waser N.M., Melendez-Ackerman E.J.. 1997. Analyzing pollinator-mediated  
580 selection in a plant hybrid zone: Hummingbird visitation patterns on three spatial scales.  
581 *Am. Nat.* 149:295–315.  
582 Chifman J., Kubatko L. 2014. Quartet inference from SNP data under the coalescent model.  
583 *Bioinformatics.* 30:3317–3324.  
584 Chifman J., Kubatko L. 2015. Identifiability of the unrooted species tree topology under the

- 585 coalescent model with time-reversible substitution processes, site-specific rate variation,  
586 and invariable sites. *J. Theor. Biol.* 374:35–47.
- 587 Christie M.R., Knowles L.L. 2015. Habitat corridors facilitate genetic resilience irrespective of  
588 species dispersal abilities or population sizes. *Evol. Appl.* 8:454-463.
- 589 Crepet W.L., Niklas K.J. 2009. Darwin’s second “abominable mystery”: Why are there so many  
590 angiosperm species? *Am. J. Bot.* 96:366–81.
- 591 Duarte J.M., Wall P.K., Edger P.P., Landherr L.L., Ma H., Pires J.C., Leebens-Mack J.,  
592 dePamphilis C.W. 2010. Identification of shared single copy nuclear genes in *Arabidopsis*,  
593 *Populus*, *Vitis* and *Oryza* and their phylogenetic utility across various taxonomic levels.  
594 *BMC Evol Biol.* 10:61.
- 595 Eckert A.J., Carstens B.C. 2008. Does gene flow destroy phylogenetic signal? The performance  
596 of three methods for estimating species phylogenies in the presence of gene flow. *Mol.*  
597 *Phylogenet. Evol.* 49:832–842.
- 598 Ehrlich, P. R., & Raven, P. H. (1969). Differentiation of populations. *Science.* 165:1228–1232.
- 599 Folk R.A., Mandel J.R., Freudenstein J. V. 2015. A protocol for targeted enrichment of intron-  
600 containing sequence markers for recent radiations: A phylogenomic example from  
601 *Heuchera* (Saxifragaceae). *Appl. Plant Sci.* 3:1500039.
- 602 Fricot E, Mathieu F, Trouillon T, Bouchard G and François O (2014) Fast and efficient  
603 estimation of individual ancestry coefficients. *Genetics.* 196:973-983.
- 604 Gerard D., Gibbs H.L., Kubatko L. 2011. Estimating hybridization in the presence of  
605 coalescence using phylogenetic intraspecific sampling. *BMC Evol. Biol.* 11:291.
- 606 Giarla T.C., Esselstyn J.A. 2015. The challenges of resolving a rapid, recent radiation: Empirical  
607 and simulated phylogenomic of Philippine shrews. *Syst. Biol.* 64(5):727-740.
- 608 Green R., Krause J., Briggs A., Rasilla Vives M., Fortea Pérez F. 2010. A draft sequence of the  
609 neandertal genome. *Science.* 328:710–722.
- 610 Heyduk K., Trapnell D.W., Barrett C.F., Leebens-mack J.I.M. 2016. Phylogenomic analyses of  
611 species relationships in the genus *Sabal* ( *Arecaceae* ) using targeted sequence capture. *Biol.*  
612 *J. Linn. Soc.* 117(1):106-120.
- 613 Hollister J.D., Greiner S., Johnson M.T.J., Wright S.I. 2019. Hybridization and a loss of sex  
614 shape genome-wide diversity and the origin of species in the evening primroses (*Oenothera*,  
615 *Onagraceae*). *New Phytol.* 224:1372–1380.
- 616 Jogesh T., Overson R.P., Raguso R.A., Skogen K.A. 2017. Herbivory as an important selective  
617 force in the evolution of floral traits and pollinator shifts. *AoB Plants.* 9(1):plw088.
- 618 Johnson M.G., Gardner E.M., Liu Y., Medina R., Goffinet B., Shaw A.J., Zerega N.J.C., Wickett  
619 N.J. 2016. HybPiper: Extracting coding sequence and introns for phylogenetics from high-  
620 throughput sequencing reads using target enrichment. *Appl. Plant Sci.* 4:1600016.
- 621 Johnson M.T.J., Smith S.D., Rausher M.D. 2009. Plant sex and the evolution of plant defenses  
622 against herbivores. *Proc. Natl. Acad. Sci.* 106:18079–18084.
- 623 Jombart, T. (2008) adegenet: a R package for the multivariate analysis of genetic markers.  
624 *Bioinformatics* 24:1403-1405.
- 625 Jombart T, Devillard S and Balloux, F (2010). Discriminant analysis of principal components: a  
626 new method for the analysis of genetically structured populations. *BMC Genetics.* 11:94.
- 627 Katinas L., Crisci J., Wagner W., Hoch P. 2004. Geographical diversification of tribes  
628 *Epilobieae*, *Gongylocarpeae*, and *Onagreae* (*Onagraceae*) in North America, based on  
629 parsimony analysis of endemism and track compatibility analysis. *Ann. Missouri Bot.*  
630 91:159–185.



- 631 Knowles L.L. 2009. Estimating species trees: Methods of phylogenetic analysis when there is  
632 incongruence across genes. *Syst. Biol.* 58:463–467.
- 633 Knowles L.L., Chan Y.-H. 2008. Resolving species phylogenies of recent evolutionary  
634 radiations. *Ann. Missouri Bot. Gard.* 95:224–231.
- 635 Kruckeberg A. 1984. *California Serpentes: Flora, Vegetation, Geology, Soils, and*  
636 *Management Problems*. Berkeley: Univ of California Press.
- 637 Kubatko L.S., Chifman J. 2019. An invariants-based method for efficient identification of hybrid  
638 species from large-scale genomic data. *BMC Evol. Biol.* 19:1–13.
- 639 Leaché A.D., Harris R.B., Rannala B., Yang Z. 2014. The influence of gene flow on species tree  
640 estimation: a simulation study. *Syst. Biol.* 63:17–30.
- 641 Lemmon A.R., Emme S.A., Lemmon E.M. 2012. Anchored hybrid enrichment for massively  
642 high-throughput phylogenomics. *Syst. Biol.* 61:727–744.
- 643 Levin R., Wagner W., Hoch P. 2004. Paraphyly in Tribe Onagreae : Insights into Phylogenetic  
644 Relationships of Onagraceae Based on Nuclear and Chloroplast Sequence Data. *Syst. Bot.*  
645 29:147–164.
- 646 Lewis, Emily. 2015. Differences in Population Genetic Structure of Hawkmoth and Bee-  
647 Pollinated Species of *Oenothera* (Onagraceae) Are More Pronounced at a Landscape  
648 Scale. Northwestern University Libraries. Masters Thesis. Northwestern University.
- 649 Maddison W.P., Knowles L. 2006. Inferring Phylogeny Despite Incomplete Lineage Sorting.  
650 *Evol. Biol.* 55:21–30.
- 651 Mamanova L., Coffey A.J., Scott C.E., Kozarewa I., Turner E.H., Kumar A., Howard E.,  
652 Shendure J., Turner D.J. 2010. Target-enrichment strategies for next- generation  
653 sequencing. *Nat. Methods.* 7:111–118.
- 654 Mandel J.R., Dikow R.B., Funk V. a, Masalia R.R., Staton S.E., Kozik A., Michelmore R.W.,  
655 Rieseberg L.H., Burke J.M. 2014. A target enrichment method for gathering phylogenetic  
656 information from hundreds of loci: An example from the Compositae. *Appl. Plant Sci.* 2:1–  
657 6.
- 658 Meng C., Kubatko L.S. 2009. Detecting hybrid speciation in the presence of incomplete lineage  
659 sorting using gene tree incongruence: A model. *Theor. Popul. Biol.* 75:35–45.
- 660 Miller R.B.. 1981. Hawkmoths and the Geographic Patterns of Floral Variation in *Aquilegia*  
661 *caerulea*. *Evolution* (N. Y). 35:763–774.
- 662 Minh B.Q., Hahn M.W., Lanfear R. 2020. New methods to calculate concordance factors for  
663 phylogenomic datasets. *Mol. Biol. Evol.* 37(9):2727-2733.
- 664 Mirarab S., Warnow T. 2015. ASTRAL-II: Coalescent-based species tree estimation with many  
665 hundreds of taxa and thousands of genes. *Bioinformatics.* 31:i44–i52.
- 666 Miyake T., Yahara T. 1998. Why does the flower of *Lonicera japonica* open at dusk?. *Can. J.*  
667 *Bot.* 76(10):1806-1811.
- 668 Moore M., Jansen R. 2007. Origins and biogeography of gypsophily in the Chihuahuan Desert  
669 plant group *Tiquilia* Subg. subg. *Eddyia*. *Syst. Bot.* 32:392–414.
- 670 Moore M.J., Mota J.F., Douglas N.A., Flores Olvera H., Ochoterena H. 2014. Ecology assembly  
671 evolution gypsophile floras. In: Rajakaruna N., Boyd R.S., Harris T.B., editors. *Plant*  
672 *Ecology and Evolution in Harsh Environments*. New York: Nova Science Publishers, Inc. p.  
673 97–128.
- 674 Nason J.D., Hamrick J.L., Fleming T.H. 2002. Historical vicariance and postglacial colonization  
675 effects on the evolution of genetic structure in *Lophocereus*, a Sonoran Desert columnar  
676 cactus. *Evolution* 56:2214–2226.

- 677 Van der Niet T., Johnson S.D. 2012. Phylogenetic evidence for pollinator-driven diversification  
678 of angiosperms. *Trends Ecol. Evol.* 27:353–361.
- 679 van der Niet T., Johnson S.D., Linder H.P. 2006. Macroevolutionary data suggest a role for  
680 reinforcement in pollination system shifts. *Evolution* 60:1596–1601.
- 681 Van Der Niet T., Peakall R., Johnson S.D. 2014. Pollinator-driven ecological speciation in  
682 plants: New evidence and future perspectives. *Ann. Bot.* 113:199–211.
- 683 Peakall R., Ebert D., Poldy J., Barrow R.A., Francke W., Bower C.C., Schiestl F.P. 2010.  
684 Pollinator specificity, floral odour chemistry and the phylogeny of Australian sexually  
685 deceptive *Chiloglottis* orchids: implications for pollinator-driven speciation. *New Phytol.*  
686 188:437–50.
- 687 Rajakaruna N. 2004. The Edaphic Factor in the Origin of Plant Species. *Int. Geol. Rev.* 46:471–  
688 478.
- 689 Raven P.H. 1964. Catastrophic Selection and Edaphic Endemism. *Evolution* 18:336–338.
- 690 Raven P.H. 1979. A survey of reproductive biology in Onagraceae. *New Zeal. J. Bot.* 17:575–  
691 593.
- 692 R Core Team. 2020. R: A language and environment for statistical computing. R Foundation for  
693 Statistical Computing, Vienna, Austria.
- 694 Roch S., Steel M. 2015. Likelihood-based tree reconstruction on a concatenation of aligned  
695 sequence data sets can be statistically inconsistent. *Theor. Popul. Biol.* 100:56–62.
- 696 Sayyari E., Mirarab S. 2016. Fast coalescent-based computation of local branch support from  
697 quartet frequencies. *Mol. Biol. Evol.* 33(7):1654–68.
- 698 Schliep K.P. 2011. phangorn: phylogenetic analysis in R. *Bioinformatics.* 27(4):592–593.
- 699 Schlumpberger B. O., Cocucci A. A., Moré M., Sérsic A. N., Raguso R. A. 2009. Extreme  
700 variation in floral characters and its consequences for pollinator attraction among  
701 populations of an Andean cactus. *Ann. Bot.* 103(9):1489–1500.
- 702 Skogen K.A., Overson R.P., Hilpman E.T., Fant J.B. 2019. Hawkmoth pollination facilitates  
703 long-distance pollen dispersal and reduces isolation across a gradient of land-use change.  
704 *Ann. Missouri Bot. Gard.* 104:495–511.
- 705 Smith S.A., Moore M.J., Brown J.W., Yang Y. 2015. Analysis of phylogenomic datasets reveals  
706 conflict, concordance, and gene duplications with examples from animals and plants. *BMC*  
707 *Evol. Biol.* 15:150.
- 708 Stamatakis A. 2014. Stamatakis - 2014 - RAxML version 8 a tool for phylogenetic analysis and  
709 post-analysis of large phylogenies. 2010–2011.
- 710 Stanton K., Valentin C.M., Wijnen M.E., Stutstman S., Palacios J.J., Cooley A.M. 2016.  
711 Absence of postmating barriers between a selfing vs. Outcrossing Chilean *Mimulus* species  
712 pair. *Am. J. Bot.* 103:1030–1040.
- 713 Stebbins G.L. 1970. Adaptive Radiation of Reproductive Characteristics in Angiosperms, I:  
714 Pollination Mechanisms. *Annu. Rev. Ecol. Syst.* 1:307–326.
- 715 Stephens J.D., Rogers W.L., Heyduk K., Cruse-Sanders J.M., Determann R.O., Glenn T.C.,  
716 Malmberg R.L. 2015. Resolving phylogenetic relationships of the recently radiated  
717 carnivorous plant genus *Sarracenia* using target enrichment. *Mol. Phylogenet. Evol.* 85:76–  
718 87.
- 719 Stockhouse R.E.I. 1973. Biosystematic Studies of *Oenothera* L. Subgenus *Pachylophus*. Univ.  
720 Microfilm. Ph.D. thesis. Colorado State University.
- 721 Straub S.C.K., Parks M., Weitemier K., Fishbein M., Cronn R.C., Liston A. 2012. Navigating the  
722 tip of the genomic iceberg: Next-generation sequencing for plant systematics. *Am. J. Bot.*

- 723 99:349–64.
- 724 Swofford, D. L. 2003. PAUP\*. Phylogenetic Analysis Using Parsimony (\*and Other Methods).
- 725 Version 4. Sinauer Associates, Sunderland, Massachusetts.
- 726 Thomson J.D., Wilson P. 2008. Explaining Evolutionary Shifts between Bee and Hummingbird
- 727 Pollination: Convergence, Divergence, and Directionality. *Int. J. Plant Sci.* 169:23–38.
- 728 Towner H.F., Raven P.H. 1970. A new species and some new combinations in *Calylophus*
- 729 (*Onagraceae*). *Madrono*. 20: 241-245.
- 730 Towner H.F. 1977. The Biosystematics of *Calylophus* (*Onagraceae*). *Ann. Missouri Bot. Gard.*
- 731 64:48–120.
- 732 Tripp E.A., Manos P.S. 2008. Is floral specialization an evolutionary dead-end? Pollination
- 733 system transitions in *Ruellia* (*Acanthaceae*). *Evolution* 62:1712–1737.
- 734 Turner B.L., Moore M.J. 2014. *Oenothera gayleana* (*Oenothera* sect. *Calylophus*, *Onagraceae*),
- 735 a new gypsophile from Texas, New Mexico, and Oklahoma. *Phytologia.org*. 96:200–206.
- 736 Wagner W., Hoch P., Raven P. 2007. Revised Classification of the *Onagraceae*. *Syst. Bot.*
- 737 *Monogr.* 83:1–240.
- 738 Wagner W.L. 2021. In press. In: *Flora of North America* Editorial Committee, eds. 1993+.
- 739 *Flora of North America North of Mexico*, 20+ vols. New York and Oxford: Oxford
- 740 University Press.
- 741 Weitemier K., Straub S.C.K., Cronn R.C., Fishbein M., Schmickl R., McDonnell A., Liston A.
- 742 2014. Hyb-Seq: Combining Target Enrichment and Genome Skimming for Plant
- 743 Phylogenomics. *Appl. Plant Sci.* 2:1400042.
- 744 Wilson P., Wolfe A.D., Armbruster W.S., Thomson J.D. 2007. Constrained lability in floral
- 745 evolution: Counting convergent origins of hummingbird pollination in *Penstemon* and
- 746 *Keckiella*. *New Phytol.* 176:883–890.
- 747 Xi Z., Liu L., Rest J.S., Davis C.C. 2014. Coalescent versus Concatenation Methods and the
- 748 Placement of *Amborella* as Sister to Water Lilies. *Syst. Biol.* 63:919–932.
- 749 Xu S., Schlüter P.M., Scopece G., Breitkopf H., Gross K., Cozzolino S., Schiestl F.P. 2011.
- 750 Floral isolation is the main reproductive barrier among closely related sexually deceptive
- 751 orchids. *Evolution*. 65:2606–20.

## 752 FIGURE LEGENDS

753

754 **Figure 1.** (a) Range map of all taxa in *Oenothera* sect. *Calylophus* (based on Towner 1977).

755 Sampling locations of leaf tissue samples (points; color corresponds to taxa in cladogram to the

756 right [Figure 1b]) and estimated taxon ranges (polygons; colors correspond to Figure 1b)

757 proposed by Towner (1977) and Turner and Moore (2014). (b) Estimated cladogram of

758 *Oenothera* sect. *Calylophus* sensu Towner (1977) and Turner and Moore (2014). Symbols to the

759 right of tip labels signify pollination system (bee, hawkmoth, or Permanent Translocation

760 Heterozygosity [PTH]) and the symbol color specifies whether a given taxon is a gypsum

761 endemic (purple = no, pink = yes). Photo panels: (c) *Oenothera hartwegii* subsp. *fendleri* (d)

762 *Oenothera hartwegii* subsp. *filifolia* (e) *Oenothera hartwegii* subsp. *hartwegii* (f) *Oenothera*

763 *hartwegii* subsp. *maccartii* (g) *Oenothera hartwegii* subsp. *pubescens* (h) *Oenothera tubicula*

764 subsp. *tubicula* (i) *Oenothera lavandulifolia* (j) *Oenothera tubicula* subsp. *strigulosa* (k)

765 *Oenothera capillifolia* subsp. *berlandieri* (l) *Oenothera capillifolia* subsp. *capillifolia* (m)

766 *Oenothera gayleana* (n) *Oenothera serrulata* (o) *Oenothera toumeyii*

767

768 **Figure 2.** ASTRAL-II summary coalescent tree constructed using the “Supercontig” dataset with  
769 100 bootstraps. At relevant nodes, piecharts represent Phyparts analysis (blue = concordant,  
770 green = most frequent conflict, yellow = all other conflict, black = uninformative gene trees), top  
771 row of support values are bootstrap values from ASTRAL-II, and gCF and sCF from IQTree  
772 (BS/gCF/sCF), bottom two support values are number of concordant gene trees for the node and  
773 total number of gene trees minus the number of concordant gene trees at that node  
774 (concord/discord). Colored tip points correspond to taxon designation.

775

776 **Figure 3.** (a) Summary of HyDe Analysis annotated on ASTRAL-III species tree constructed  
777 using the “Supercontig” dataset; black arrows represent direction of admixture detected by HyDe  
778 analysis. (b) Discriminant Analysis of Principal Components based on a filtered set of SNPs  
779 extracted from the entire supercontig dataset, and (c) sNMF plot of inferred ancestry coefficients  
780 using the same set of filtered SNPs but limited to subsection *Salpingia* (minus *O. lavandulifolia*)  
781

782

783 **Figure 4.** Morphometric Principal Components Analysis (PCA) using 9 morphological  
784 characters (plant height, leaf length [basal and distal], leaf width [basal and distal], leaf  
785 length/width ratio (basal and distal), and sepal tip length) for (a) Section *Calylophus* (b)  
786 Subsection *Salpingia* without *O. toumeyi*, and (c) Subsection *Calylophus* with *O. toumeyi*  
included.

787 SUPPLEMENTAL MATERIAL

788 S1.

789 See excel table “S1 Accessions and Seq Stats”

790

791 S2.

792 Number of leaf tissue accessions sequenced from each taxon

| Taxon                                              | No. of Accessions <sup>793</sup> |     |
|----------------------------------------------------|----------------------------------|-----|
| <i>O. lavandulifolia</i>                           | 16                               | 794 |
| <i>O. tubicula</i> subsp. <i>strigulosa</i>        | 3                                | 795 |
| <i>O. tubicula</i> subsp. <i>tubicula</i>          | 9                                | 796 |
| <i>O. hartwegii</i> subsp. <i>fendleri</i>         | 15                               | 797 |
| <i>O. hartwegii</i> subsp. <i>filifolia</i>        | 44                               | 798 |
| <i>O. hartwegii</i> subsp. <i>hartwegii</i>        | 12                               | 799 |
| <i>O. hartwegii</i> subsp. <i>maccartii</i>        | 9                                | 800 |
| <i>O. hartwegii</i> subsp. <i>pubescens</i>        | 26                               | 801 |
| <i>O. hartwegii</i>                                | 1                                | 802 |
| <i>O. toumeyi</i>                                  | 5                                | 803 |
| <i>O. capillifolia</i> subsp. <i>berlandieri</i>   | 17                               | 804 |
| <i>O. capillifolia</i> subsp. <i>capillifolia</i>  | 11                               | 805 |
| <i>O. gayleana</i>                                 | 9                                | 806 |
| <i>O. serrulata</i>                                | 17                               | 807 |
| Outgroups:                                         |                                  | 808 |
| <i>O. pilosella</i>                                | 1                                | 809 |
| <i>O. organensis</i>                               | 1                                | 810 |
| <i>O. primiveris</i>                               | 1                                | 811 |
| <i>O. tubifera</i>                                 | 1                                | 812 |
| <i>O. triloba</i>                                  | 1                                | 813 |
| <i>O. cespitosa</i> subsp. <i>cespitosa</i>        | 1                                | 814 |
| <i>O. suffrutescens</i>                            | 1                                | 815 |
| <i>Chylismia scapoidea</i> subsp. <i>scapoidea</i> | 1                                | 816 |
| <i>Eulobus californicus</i>                        | 1                                | 817 |
| Total                                              | 203                              | 817 |
|                                                    |                                  | 818 |

819 S3.

820 MATERIALS AND METHODS

821 *Taxon Sampling, DNA Extraction, and Determination of PTH*

822 A total of 194 individuals spanning the geographic, morphological, and ecological ranges  
 823 of all 13 recognized taxa in *Oenothera* sect. *Calylophus* [following Towner (1977) and Turner  
 824 and Moore (2014)] were included in this study (Fig. 1a, S1, S2) along with eight outgroups  
 825 representing other major sections of *Oenothera* (*Eremia*, *Gaura*, *Kneiffia*, *Lavauxia*, *Oenothera*,  
 826 *Pachylophus*, and *Ravenia*) and other genera (*Chylismia* and *Eulobus*) in Onagraceae (S1, S2).  
 827 All leaf tissue samples were collected from individuals in the field between 2007 and 2015 and  
 828 voucher specimens were deposited at the United States National Herbarium (US), with



829 duplicates in most cases at either the Nancy Rich Poole Herbarium (CHIC) or the George T.  
830 Jones Herbarium at Oberlin College (OC; S1). DNA was extracted from fresh, silica-dried leaf  
831 tissue using either (1) a modified CTAB protocol (Doyle 1987), (2) the Nucleon PhytoPure DNA  
832 extraction kit (GE Healthcare Life Sciences, Pittsburgh, Pennsylvania, USA), or (3) a modified  
833 CTAB and silicon dioxide purification protocol (Doyle 1987; Sharma and Purohit 2012; See S13  
834 for details) followed by passing any extractions retaining a brown or yellow coloration through a  
835 Qiagen Qiaquick PCR spin column for additional purification according to the manufacturer's  
836 protocol (Qiagen, Venlo, Netherlands). The third DNA extraction method was used for difficult  
837 to extract, polysaccharide-rich leaf tissue samples that yielded goeey, discolored DNA following  
838 initial extraction. PTH status was determined for individuals in subsect. *Calylophus* using floral  
839 morphology and/or when flowers were present by assessing pollen fertility using a modified  
840 Alexander stain, as PTH taxa have a demonstrated 50% reduction in pollen fertility (Towner  
841 1977). For accessions identified as either *O. capillifolia* subsp. *berlandieri* or *O. serrulata* that  
842 had sufficient pollen available, pollen was removed from flowers and stained using a modified  
843 Alexander stain (Alexander 1969, 1980). Accessions with less than 50% viable pollen were  
844 assigned to *O. serrulata*, the only currently recognized PTH taxon in subsect. *Calylophus*. Pollen  
845 count data are provided in Supplement 12 (See S12 for details).

846

#### 847 *Bait Design, Library Construction, Target Enrichment, and Sequencing*

848 We targeted 322 orthologous, low-copy nuclear loci determined by clustering  
849 transcriptomes of *Oenothera serrulata* (1KP accession *SJAN*) and *Oenothera berlandieri* (1KP  
850 accession *EQYT*) to select a subset of the 956 phylogenetically informative *Arabidopsis* loci  
851 identified by Duarte et al. (2010). Transcriptomes of two *Oenothera* species, *O. serrulata* and *O.*  
852 *berlandieri*, were assembled and optimal isoforms were filtered for the longest reading frame  
853 using custom Perl scripts. Assembled transcripts were aligned as amino acids to the 956 TAIR  
854 loci of *Arabidopsis* in TranslatorX (Abascal et al. 2010). This alignment identified 956  
855 orthologous sequences, from which 322 loci were randomly selected. BLAST searches of amino  
856 acid sequences from these loci were carried out to ensure orthology between the transcript loci  
857 and the *Arabidopsis* TAIR locus. The bait set was designed from these 322 loci, which were  
858 selected from both *O. serrulata* and *O. berlandieri* sequences. A set of 19,994 120-bp baits tiled  
859 across each locus with a 60 base overlap (2x tiling) was manufactured by Arbor Biosciences  
860 (formerly MYcroarray, Ann Arbor, Michigan, USA). Sequencing libraries for 67 samples were  
861 prepared with the Illumina TruSeq Nano HT DNA Library Preparation Kit (San Diego,  
862 California, USA) following the manufacturer's protocol, except using half volumes beginning  
863 with the second addition of Dynabeads MyOne Streptavidin C1 magnetic beads (Invitrogen,  
864 Carlsbad, CA, USA). DNA samples were sheared using a Covaris M220 Focused-Ultrasonicator  
865 (Covaris, Woburn, Maryland, USA) to a fragment length of ~550 bp (for an average insert size  
866 of ~420 bp). The remaining 134 libraries were constructed by Rapid Genomics (Gainesville,  
867 Florida, USA), with custom adapters. The Illumina i5 and i7 barcodes were used for all libraries.

868 Libraries were enriched for these loci using the MyBaits protocol (ArborBiosciences  
869 2016) with combined pools of libraries totaling 1.2 µg of DNA (12 libraries/pool at 100  
870 ng/library). Libraries with less than 100 ng of total recovered DNA were pooled together in  
871 equimolar concentrations using available product, resulting in some pools with less than 1.2 µg  
872 of DNA. The smallest successful pool contained four samples with 6 ng of library each.  
873 Hybridization was performed at 65°C for approximately 18 hours. The enriched libraries were  
874 reamplified with 14 to 18 PCR cycles and a final cleanup was performed using a Qiagen

875 QiaQuick PCR cleanup kit following the manufacturer's protocol to remove bead contamination  
876 (Qiagen, Venlo, Netherlands). DNA concentrations were measured using a Qubit 2.0  
877 Fluorometer (Life Technologies, Carlsbad, California, USA) and molarity was measured on an  
878 Agilent 2100 Bioanalyzer (Agilent Technologies, Santa Clara, California, USA). A final  
879 cleaning step using Dynabeads MyOne Streptavidin C1 magnetic beads was performed on pools  
880 with adapter contamination as detected on the Bioanalyzer. Pools were sequenced in four runs at  
881 equimolar ratios (4 nM), on an Illumina MiSeq (2 x 300 cycles, v3 chemistry; Illumina, Inc., San  
882 Diego, California, USA) at the Pritzker DNA lab (Field Museum, Chicago, IL, USA). This  
883 produced 80,273,296 pairs of 300-bp reads. Reads were demultiplexed and adapters trimmed  
884 automatically by Illumina Basespace (Illumina 2016). Raw reads have been deposited at the  
885 NCBI Sequence Read Archive (BioProject PRJNA544074).

886

### 887 *Quality Filtering, Assembly and Alignment*

888 A summary of read quality from each sample was produced using FastQC  
889 (<http://www.bioinformatics.babraham.ac.uk/people.html>), which revealed read-through adapter  
890 contamination in many of the poorer quality samples. To remove read-through contamination  
891 and filter for quality, reads were trimmed for known Illumina adapters using Trimmomatic  
892 (Bolger et al. 2014) with the following settings:

893 ILLUMINACLIP:<illumina\_adapters.fasta>:2:30:10 LEADING:10 TRAILING:10  
894 SLIDINGWINDOW:4:20 MINLEN:20. Trimmed, quality-filtered reads were assembled using  
895 the HybPiper pipeline (Johnson et al. 2016) with default settings, followed by the intronrate.py  
896 script, to produce both exons and the “splash zone” flanking non-coding region-containing  
897 supercontigs. Only pairs with both mates surviving trimming and quality filtering were used for  
898 HybPiper.

899 To compare the influence of “splash-zone” non-coding regions, two sets of alignments  
900 were created: (1) exons alone, and (2) coding sequences plus the “splash-zone” (Hereby referred  
901 to as supercontigs). For multiple sequence alignments of exons alone, protein and nucleotide  
902 sequences assembled in HybPiper were gathered into fasta files by gene. For protein sequences  
903 only, stop codons were changed to “X” using a sed command-line regular expression to facilitate  
904 alignment, and sequences were aligned using MAFFT with settings: --auto --adjustdirection --  
905 maxiterate 1000 (Katoh et al. 2002). Aligned protein sequences were then used to fit unaligned  
906 nucleotide sequences into coding frame alignments using pal2nal with default settings (Suyama  
907 et al. 2006). In-frame, aligned DNA sequences were trimmed to remove low-coverage positions  
908 and sequences composed only of gaps using TrimAl with the automated setting, which is  
909 optimized for maximum likelihood analyses (Gutierrez et al. 2009). For supercontigs, nucleotide  
910 sequences assembled using HybPiper were gathered into fasta files by gene, gene names were  
911 removed from fasta headers using a command-line regular expression, and sequences were  
912 aligned in MAFFT with settings: --auto --adjustdirection --maxiterate 1000 (Katoh et al. 2002).  
913 Reverse compliment tags (“\_R\_”) were removed from taxon names using a command-line  
914 regular expression, and sequences were trimmed using TrimAl with previously listed settings  
915 optimized for maximum likelihood analyses (Gutierrez et al. 2009). To minimize the effects of  
916 missing data on phylogenetic analyses, accessions with < 50% of loci passing quality filtering  
917 were removed, and genes that were recovered across < 70% of the total remaining samples were  
918 also removed. Following quality filtering, we recovered 204 high quality loci (present in at least  
919 70% of samples) and an average of 625,323 reads per sample (S1). Final assemblies are available  
920 at Dryad ([http://dx.doi.org/10.5061/dryad.\[NNNN\]](http://dx.doi.org/10.5061/dryad.[NNNN])). Bioinformatics pipelines and analyses were



921 run at the high-performance computing cluster (“Treubia”) at the Chicago Botanic Garden unless  
922 otherwise specified.

923

### 924 *Phylogenetic Reconstruction*

925 We conducted phylogenetic analyses using two strategies for each set of alignments.  
926 Alignments were concatenated and analyzed using maximum likelihood (ML) in RAxML  
927 (Stamatakis 2014; hereafter referred to as “concatenation”), whereas coalescent-based analyses  
928 were conducted using ML gene trees in ASTRAL-II (Mirarab and Warnow 2015; Sayyari and  
929 Mirarab 2016) and using unlinked SNPs in SVDquartets (Chifman and Kubatko 2014, 2015)  
930 implemented in PAUP\* beta version 4.0a168 (Swofford 2003; S3). In concatenation analyses,  
931 after aligning each gene separately in MAFFT, genes were concatenated, partitioned, and  
932 maximum likelihood trees were reconstructed in RAxML Version 8 (Stamatakis 2014) using the  
933 GTRCAT model with 100 “rapid-boostrapping” psuedoreplicates and *Chylismia scapoidea* as  
934 the outgroup, on the CIPRES Science Gateway computing cluster (Miller et al. 2010). For  
935 coalescent analyses, individual gene trees were first estimated using RAxML Version 8  
936 (Stamatakis 2014), with 100 “rapid-boostrapping” psuedo-replicates and settings: -p 12345 -x  
937 12345 -N 100 -c 25 -f a -m GTRCAT -s, and *Chylismia scapoidea* as the outgroup. Gene trees  
938 based on supercontigs were not partitioned by codon position. Coalescent-based analyses of  
939 accessions were conducted in ASTRAL-II (Mirarab and Warnow 2015; Sayyari and Mirarab  
940 2016) with default settings using the best RAxML gene trees and their associated bootstrap files  
941 as input, and in SVD Quartets (Chifman and Kubatko 2014, 2015) with default settings using an  
942 inframe aligned supermatrix with all 204 loci and supercontigs. ASTRAL-II and SVD Quartets  
943 analysis was performed with 100 multi-locus bootstraps.

944 To assess concordance among gene trees and provide additional support complementary  
945 to bootstrap values, we conducted two additional analyses. First, we assessed raw gene tree  
946 concordance using Phyparts (Smith et al. 2015). Prior to running Phyparts, nodes with < 33%  
947 support in the supercontig RAxML gene trees were collapsed using the sumtrees command in  
948 Dendropy (Sukumaran 2010). These gene trees were then re-rooted using *Chylismia scapoidea*  
949 as the outgroup and ASTRAL-II was rerun using these collapsed, re-rooted gene trees as the  
950 input files. Pie charts showing gene tree discordance were generated and overlaid on the  
951 resulting ASTRAL-II tree using the PhypartsPiecharts script  
952 (<https://github.com/mossmatters/phyloscripts/tree/master/phypartspiecharts>). Phyparts piecharts  
953 and gene tree concordance values were also added to Figure 1 by importing the two data files  
954 produced by the Phypartspiecharts.py into R and manually matching them to key nodes on our  
955 ASTRAL-II supercontig tree using *ggtree* version 1.14.6 (G Yu, DK Smith, H Zhu, Y Guan  
956 2017). We also generated gene and site concordance factors for our ASTRAL-II tree constructed  
957 using supercontigs in IQTree v1.7-beta16 (Minh et al. 2018). IQtree calculates the gene  
958 concordance factor (gCF) and accounts for incomplete taxon coverage among gene trees and  
959 therefore may provide a more accurate representation of agreement among gene trees than other  
960 methods. In addition to gCF, IQTree calculates the site concordance factor (sCF), which is  
961 defined as the percentage of decisive nucleotide sites supporting a specific node (Minh et al.  
962 2018). We used the RAxML gene trees produced for the ASTRAL-II supercontig analysis, and  
963 supercontig alignments themselves, as the inputs for IQtree. For computing sCF, we randomly  
964 sampled 100 quartets around each internal node. Finally, we mapped gCF and sCF values to the  
965 ASTRAL-II supercontig tree produced in our previous summary coalescent analysis (Fig. 2). All

966 phylogenetic trees, with the exception of the full Phyparts picharts tree, were visualized using the  
967 R package *ggtree* version 1.14.6 (G Yu, DK Smith, H Zhu, Y Guan 2017).

968

### 969 *Ancestral State Reconstruction*

970 To infer ancestral conditions and the number of transitions in reproductive system, we  
971 used the *phangorn* (Schliep 2011) package in R. First, a Coalescent-based species tree with  
972 accessions grouped into taxa using a mapping file was estimated in ASTRAL-III (Zhang et al.  
973 2018) with default settings using the best RAxML gene trees and their associated bootstrap files,  
974 from the supercontig alignments, as input. Next we time calibrated the ASTRAL-III species tree  
975 to 1 million years based on estimates of other taxa in the genus (Evans et al. 2009) using the  
976 *makeChronosCalib* function in the *ape* (Paradis et al. 2004) package in R, and estimated an  
977 ultrametric tree using the *chronos* function in *ape* (Paradis et al. 2004) with settings:  $\lambda = 1$ ,  
978  $\text{model} = \text{"relaxed"}$ . Finally, we performed marginal reconstruction of ancestral character states  
979 using the maximum likelihood method using the *optim.pml* and *ancestral.pml* functions in the  
980 *phangorn* (Schliep 2011) package in R.

981

### 982 *Testing for Hybrid Origins with HyDe*

983 To test for putative hybrid origins of selected taxa, we used HyDe (Blischak et al. 2018)  
984 to calculate D-Statistics (Green et al. 2010) for a set of hypotheses (S10). Briefly, HyDe  
985 considers a four-taxon network of an outgroup and a triplet of ingroup populations to detect  
986 hybridization from phylogenetic invariants that arise under the coalescent model with  
987 hybridization. Introgression between P3 and either P1 or P2 influences the relative frequencies of  
988 ABBA and BABA, and the D-statistic measures the imbalance between these frequencies. We  
989 tested the triplets in (S10) and set *Chylismia scapoidea* as the outgroup. We considered  
990 hypothesis tests significant at an overall  $\alpha < 0.05$  level with estimates of  $\gamma$  between 0 and 1. Z-  
991 scores greater than 3 are generally interpreted as strong evidence of introgression.

992

### 993 *Population-level Analysis*

994 To further characterize population-level processes or genetic structure within sect.  
995 *Calylophus*, we extracted and filtered SNPs by mapping individual reads against reference  
996 supercontigs (see <https://github.com/lindsawi/HybSeq-SNP-Extraction>). To account for  
997 duplicates arising from PCR during HybSeq in SNP calling and filtering, first we selected the  
998 sample with the highest target recovery rate and sequencing depth as a target reference sequence  
999 (*Oenothera capillifolia berlandieri\_bjc19*) and gathered supercontigs for this individual into a  
1000 single target FASTA file. We then ran BWA (Li and Durbin 2009) to align sequences, Samtools  
1001 'index' (Danecek et al. 2011) and GATK CreateSequenceDictionary (Poplin et al. 2017),  
1002 respectively, on the resulting target FASTA file. Next we ran a custom script  
1003 "variant\_workflow.sh" using both read files from each *Calylophus* sample as input to create a  
1004 vcf file for each sample. SNP's were called for each individual using GATK (Poplin et al. 2017)  
1005 and the vcf file from each sample as input. The resulting vcf file created in the previous step was  
1006 filtered to remove indels using GATK and the original target FASTA file as input, and then  
1007 filtered again based on read mapping and quality with GATK VariantFiltration with settings: --  
1008 filterExpression "QD < 5.0 || FS > 60.0 || MQ < 40.0 || MQRankSum < -12.5 || ReadPosRankSum  
1009 < -8.0" (Poplin et al. 2017). Finally, we generated a reduced SNP file in FastStructure format  
1010 using PLINK (Purcell et al. 2007) to remove SNPs that did pass filter using the command: `plink -  
1011 -vcf-filter --vcf Pachylophus.filtered.snps.vcf --const-fid --allow-extra-chr --geno --make-bed --`

1012 recode structure. Finally we used Discriminant Analysis of Principal Components (Jombart et al.  
1013 2010) as implemented in the R package *adegenet* (Jombart 2008) and the *snmf* function in the  
1014 LEA package (Frichot and François 2015) in R (R Core Team, 2020).

1015

#### 1016 *Morphological Measurements and Analysis*

1017 To assess taxon boundaries and patterns of morphological variation, we measured  
1018 character states for the following key morphological structures that have been used historically to  
1019 discriminate taxa in sect. *Calylophus* (Towner 1977): plant height, leaf length (distal), leaf width  
1020 (distal), leaf length/width ratio (distal), leaf length (basal), leaf width (basal), leaf length/width  
1021 (basal), sepal length, and sepal tip length. Measurements were made with digital calipers when  
1022 possible, or with a standard metric ruler and dissecting scope, from voucher specimens of nearly  
1023 all sampled populations of sect. *Calylophus* included in our molecular phylogenetic analyses.  
1024 Measurements are provided in S11 and have been deposited at Dryad  
1025 ([http://dx.doi.org/10.5061/dryad.\[NNNN\]](http://dx.doi.org/10.5061/dryad.[NNNN])). Morphological measurements were log transformed  
1026 using the R base function ‘log’ (R Core Team 2018) prior to Principal Components Analysis  
1027 (PCA), which was conducted in R using the *stats* package version 3.7 and the function  
1028 ‘prcomp’ (R Core Team 2018). All ‘NA’ values were omitted from analysis. Plots of PCA results  
1029 were visualized using the *ggplot2* package in R (Wickham 2016).

1030

#### 1031 REFERENCES

- 1032 Abascal F., Zardoya R., Telford M.J. 2010. TranslatorX: Multiple alignment of nucleotide  
1033 sequences guided by amino acid translations. *Nucleic Acids Res.* 38:7–13.
- 1034 Alexander M.P. 1969. Differential Staining of Aborted and Nonaborted Pollen. *Stain Technol.*  
1035 44:117–122.
- 1036 Alexander M.P. 1980. A Versatile Stain for Pollen Fungi, Yeast and Bacteria. *Stain Technol.*  
1037 55:13–18.
- 1038 ArborBiosciences. 2016. In-Solution Sequence Capture for Targeted High-Throughput  
1039 Sequencing: Version 3.02. .
- 1040 Blischak P.D., Chifman J., Wolfe A.D., Kubatko L.S. 2018. HyDe: A python package for  
1041 genome-scale hybridization detection. *Syst. Biol.* 67:821–829.
- 1042 Bolger A.M., Lohse M., Usadel B. 2014. Trimmomatic: A flexible trimmer for Illumina  
1043 sequence data. *Bioinformatics.* 30:2114–2120.
- 1044 Chifman J., Kubatko L. 2014. Quartet inference from SNP data under the coalescent model.  
1045 *Bioinformatics.* 30:3317–3324.
- 1046 Chifman J., Kubatko L. 2015. Identifiability of the unrooted species tree topology under the  
1047 coalescent model with time-reversible substitution processes, site-specific rate variation,  
1048 and invariable sites. *J. Theor. Biol.* 374:35–47.
- 1049 Danecek P., Auton A., Abecasis G., Albers C.A., Banks E., DePristo M.A., Handsaker R.E.,  
1050 Lunter G., Marth G.T., Sherry S.T., McVean G., Durbin R. 2011. The variant call format  
1051 and VCFtools. *Bioinformatics.* 27:2156–2158.
- 1052 Doyle J.J. 1987. A Rapid DNA Isolation Procedure for Small Quantities of Fresh Leaf Tissue.  
1053 *Phytochem Bull.*:11–15.
- 1054 Duarte J.M., Wall P.K., Edger P.P., Landherr L.L., Ma H., Pires J.C., Leebens-Mack J.,  
1055 dePamphilis C.W. 2010. Identification of shared single copy nuclear genes in *Arabidopsis*,  
1056 *Populus*, *Vitis* and *Oryza* and their phylogenetic utility across various taxonomic levels.  
1057 *BMC Evol Biol.* 10:61.

- 1058 Evans M.E.K., Smith S. a, Flynn R.S., Donoghue M.J. 2009. Climate, niche evolution, and  
1059 diversification of the “bird-cage” evening primroses (*Oenothera*, sections *Anogra* and  
1060 *Kleinia*). *Am. Nat.* 173:225–40.
- 1061 G Yu, DK Smith, H Zhu, Y Guan T.L. 2017. ggtree: an R package for visualization and  
1062 annotation of phylogenetic trees with their covariates and other associated data. *Methods*  
1063 *Ecol. Evol.*:28–36.
- 1064 Green R., Krause J., Briggs A., Rasilla Vives M., Fortea Pérez F. 2010. A draft sequence of the  
1065 neandertal genome. *Science* (80-. ). 328:710–722.
- 1066 Gutiérrez S.C., Martínez J.M.S., Gabaldón T. 2009. TrimAl : a tool for automatic alignment  
1067 trimming. *Bioinformatics.*:1–2.
- 1068 Illumina. 2016. BaseSpace Sequence Hub. Available from <https://basespace.illumina.com/>.
- 1069 Johnson M.G., Gardner E.M., Liu Y., Medina R., Goffinet B., Shaw A.J., Zerega N.J.C., Wickett  
1070 N.J. 2016. HybPiper: Extracting Coding Sequence and Introns for Phylogenetics from High-  
1071 Throughput Sequencing Reads Using Target Enrichment. *Appl. Plant Sci.* 4:1600016.
- 1072 Katoh K., Misawa K., Kuma K., Miyata T. 2002. MAFFT: a novel method for rapid multiple  
1073 sequence alignment based on fast Fourier transform. *Nucleic Acids Res.* 30:3059–3066.
- 1074 Li H., Durbin R. 2009. Fast and accurate short read alignment with Burrows-Wheeler transform.  
1075 *Bioinformatics.* 25:1754–1760.
- 1076 Miller M.A., Pfeiffer W., Schwartz T. 2010. Creating the CIPRES Science Gateway for  
1077 inference of large phylogenetic trees. 2010 Gatew. Comput. Environ. Work. GCE 2010.
- 1078 Minh B.Q., Hahn M.W., Lanfear R. 2018. New methods to calculate concordance factors for  
1079 phylogenomic datasets. *bioRxiv.*:487801.
- 1080 Mirarab S., Warnow T. 2015. ASTRAL-II: Coalescent-based species tree estimation with many  
1081 hundreds of taxa and thousands of genes. *Bioinformatics.* 31:i44–i52.
- 1082 Paradis E., Claude J., Strimmer K. 2004. APE: Analyses of phylogenetics and evolution in R  
1083 language. *Bioinformatics.* 20:289–290.
- 1084 Poplin R., Ruano-Rubio V., DePristo M.A., Fennell T.J., Carneiro M.O., Auwera G.A. Van der,  
1085 Kling D.E., Gauthier L.D., Levy-Moonshine A., Roazen D., Shakir K., Thibault J.,  
1086 Chandran S., Whelan C., Lek M., Gabriel S., Daly M.J., Neale B., MacArthur D.G., Banks  
1087 E. 2017. Scaling accurate genetic variant discovery to tens of thousands of samples.  
1088 *bioRxiv.*:201178.
- 1089 Purcell S., Neale B., Todd-Brown K., Thomas L., Ferreira M.A.R., Bender D., Maller J., Sklar  
1090 P., De Bakker P.I.W., Daly M.J., Sham P.C. 2007. PLINK: A tool set for whole-genome  
1091 association and population-based linkage analyses. *Am. J. Hum. Genet.* 81:559–575.
- 1092 R Core Team. 2018. R: A language and environment for statistical computing. .
- 1093 Sayyari E., Mirarab S. 2016. Fast coalescent-based computation of local branch support from  
1094 quartet frequencies. *Mol. Biol. Evol.*:msw079.
- 1095 Schliep K.P. 2011. phangorn: Phylogenetic analysis in R. *Bioinformatics.* 27:592–593.
- 1096 Sharma P., Purohit S.D. 2012. An improved method of DNA isolation from polysaccharide rich  
1097 leaves of *Boswellia serrata* Roxb. *Indian J. Biotechnol.* 11:67–71.
- 1098 Smith S.A., Moore M.J., Brown J.W., Yang Y. 2015. Analysis of phylogenomic datasets reveals  
1099 conflict, concordance, and gene duplications with examples from animals and plants. *BMC*  
1100 *Evol. Biol.* 15:150.
- 1101 Stamatakis A. 2014. Stamatakis - 2014 - RAxML version 8 a tool for phylogenetic analysis and  
1102 post-analysis of large phylogenies. :2010–2011.
- 1103 Sukumaran J. and M.T.H. 2010. DendroPy: A Python library for phylogenetic computing.

1104           Bioinformatics.:1569–1571.  
1105   Suyama M., Torrents D., Bork P. 2006. PAL2NAL: Robust conversion of protein sequence  
1106           alignments into the corresponding codon alignments. *Nucleic Acids Res.* 34:609–612.  
1107   Towner H.F.. 1977. The Biosystematics of Calylophus ( Onagraceae ). *Ann. Missouri Bot. Gard.*  
1108           64:48–120.  
1109   Wickham H. 2016. *ggplot2: Elegant Graphics for Data Analysis*. Springer-Verlag.  
1110   Zhang C., Rabiee M., Sayyari E., Mirarab S. 2018. ASTRAL-III: polynomial time species tree  
1111           reconstruction from partially resolved gene trees. *BMC Bioinformatics.* 19:153.  
1112











1125 S7.

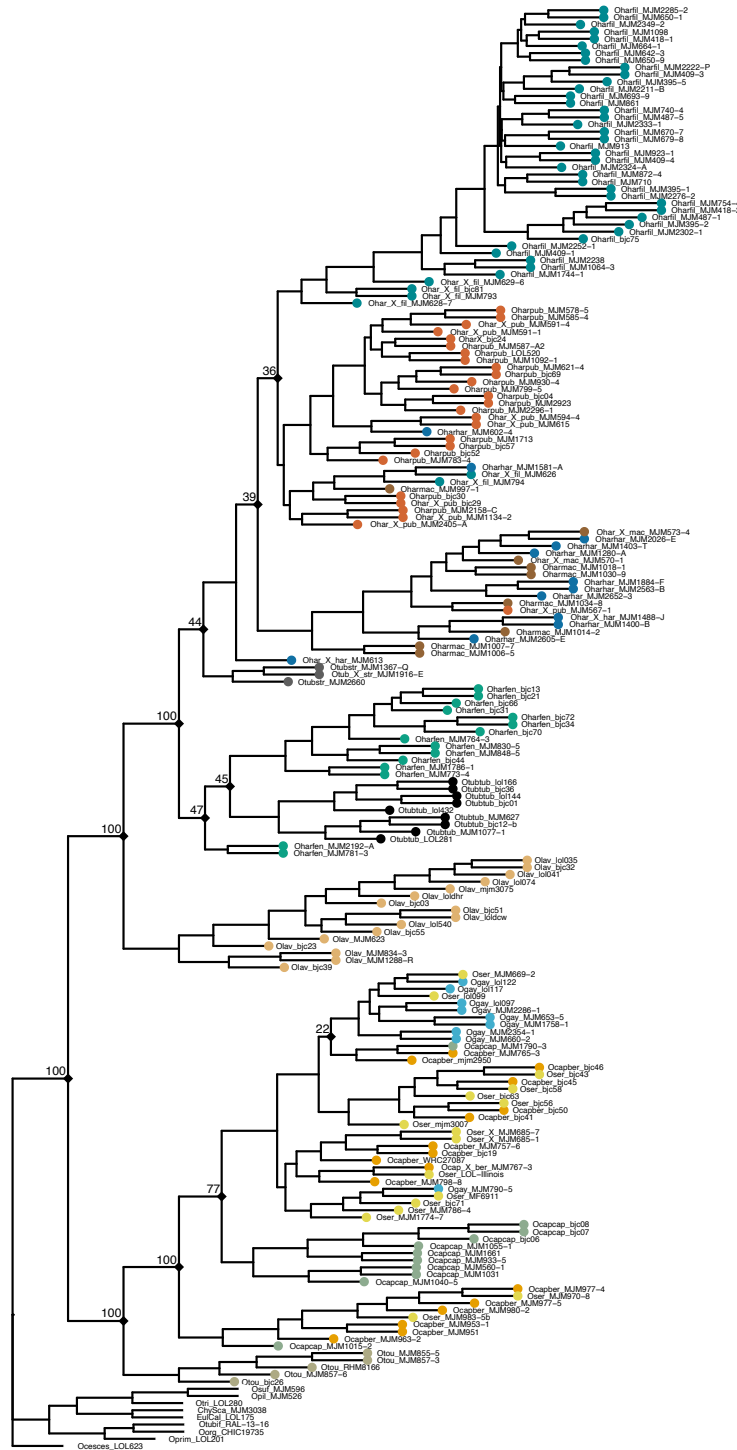

1126

1127

1128

SVD Quartets summary coalescent tree constructed using the supercontig dataset with 100 bootstraps. Bootstrap values indicated at relevant nodes.

1129

1130 S8.

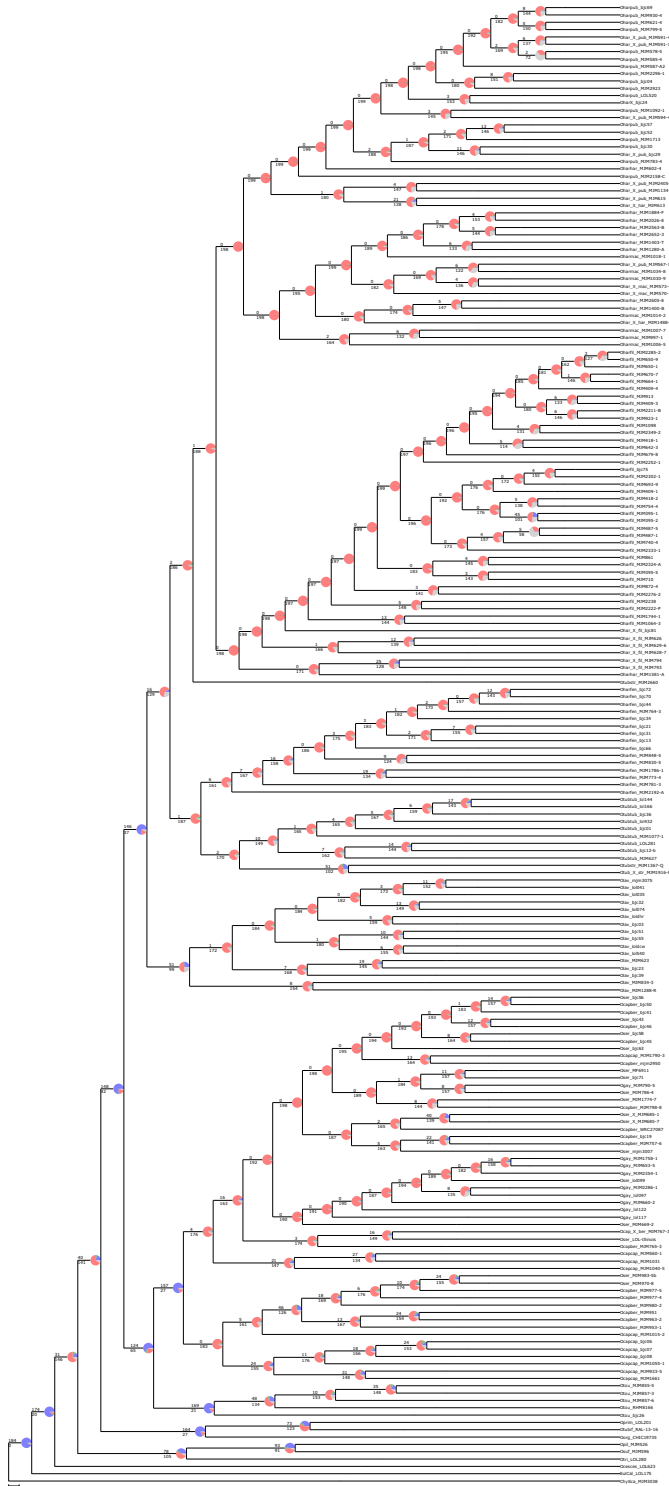

1131

1132

1133

1134

Phyparts piecharts ASTRAL-II tree constructed using the supercontig dataset. Piechart colors correspond to: blue = concordant, green = top alternative bipartition, red = all other alternative bipartitions, black = uninformative for that node.

1135 S9.

1136 Summary of support values for current and proposed taxonomic treatments, by analysis. ‘e’  
 1137 signifies trees based on exon-only data, “e+i” signifies trees based on supercontigs. ‘p’ indicates  
 1138 paraphyletic, unsupported taxon treatment according to tree topology.

| Taxon                                                                                                   | Concat. e | Concat. e+i | ASTRAL-II e | ASTRAL-II e+i | SVDQ e+i | Phyparts | gCF iQtree e+i | sCF iQtree e+i |
|---------------------------------------------------------------------------------------------------------|-----------|-------------|-------------|---------------|----------|----------|----------------|----------------|
| a. <i>Oenothera hartwegii</i> (Towner 1977)                                                             | p         | p           | p           | p             | p        | p        | p              | p              |
| b. <i>Oenothera hartwegii</i> subsp. <i>fendleri</i> (Towner 1977)                                      | <50       | p           | 81          | 99            | p        | 1/ 188   | 1              | 38             |
| c. <i>Oenothera hartwegii</i> subsp. <i>filifolia</i> (Towner 1977)                                     | p         | p           | <50         | <50           | <50      | 1/ 190   | 0              | 36             |
| d. <i>Oenothera hartwegii</i> subsp. <i>hartwegii</i> (Towner 1977)                                     | p         | p           | p           | p             | p        | p        | p              | p              |
| e. <i>Oenothera hartwegii</i> subsp. <i>macartii</i> (Towner 1977)                                      | p         | p           | p           | p             | p        | p        | p              |                |
| f. <i>Oenothera hartwegii</i> subsp. <i>hartwegii</i> + subsp. <i>macartii</i>                          | p         | p           | <50         | <50           | <50      | 0/ 200   | 0              | 33             |
| g. <i>Oenothera hartwegii</i> subsp. <i>pubescens</i> (Towner 1977)                                     | p         | p           | <50         | <50           | <50      | 0/ 200   | 0              | 36             |
| h. <i>Oenothera lavandulifolia</i> (Towner 1977)                                                        | 100       | p           | 100         | 100           | 100      | 147/37   | 74             | 83             |
| i. <i>Oenothera tubicula</i> (Towner 1977)                                                              | p         | p           | p           | p             | p        | 1/ 188   | p              | p              |
| j. <i>Oenothera tubicula</i> subsp. <i>tubicula</i> (Towner 1977)                                       | p         | p           | 81          | 99            | <50      | 2/ 171   | 1              | 38             |
| k. <i>Oenothera tubicula</i> subsp. <i>strigulosa</i> (Towner 1977)                                     | p         | p           | 81          | 100           | <50      | p        | 0              | 37             |
| l. <i>Oenothera fendleri</i> + <i>Oenothera tubicula</i> subsp. <i>tubicula</i>                         | p         | p           | 100         | 100           | <50      | 16/129   | 10             | 40             |
| m. <i>Oenothera toumeyi</i> (Towner 1977)                                                               | 100       | 100         | 100         | 100           | 100      | 125/65   | 62             | 56             |
| n. <i>Oenothera toumeyi</i> + subsect. <i>Calylophus</i>                                                | 100       | 100         | 100         | 100           | 100      | 149/42   | 76             | 65             |
| o. <i>Oenothera capillifolia</i> (Towner 1977)                                                          | p         | p           | p           | p             | p        | p        | p              | p              |
| p. <i>Oenothera capillifolia</i> subsp. <i>capillifolia</i> (Towner 1977)                               | p         | p           | <50         | p             | <77      | p        | p              | p              |
| q. <i>Oenothera capillifolia</i> subsp. <i>berlandieri</i> (Towner 1977)                                | p         | p           | p           | p             | p        | p        | p              | p              |
| r. <i>Oenothera capillifolia</i> subsp. <i>berlandieri</i> (New Taxon; South Texas coastal populations) | p         | p           | <50         | 100           | 100      | 157/27   | 79             | 86             |
| s. <i>Oenothera serrulata</i> (Towner 1977)                                                             | p         | p           | p           | p             | p        | p        | p              | p              |
| t. <i>Oenothera ‘australis’</i> (New Taxon; South Texas <i>O. serrulata</i> )                           | p         | 100         | p           | p             | p        | 10/175   | p              | p              |
| u. <i>Oenothera gayleana</i> (Turner & Moore 2014)                                                      | p         | p           | p           | p             | p        | p        | p              | p              |
| v. <i>Oenothera gayleana</i> (Revised Taxon)                                                            | p         | p           | p           | <50           | <50      | 0/ 193   | 0              | 35             |

1139

1140 S10.

1141 List of admixture hypotheses tested, Zscore, P-value and Gamma results from HyDe analysis.  
 1142 Each row represents a triplet set that was tested consisting of a putative hybrid individual and  
 1143 two parent groups; Parent 1 and Parent 2 (see “HyDe Group” Appendix I for group  
 1144 membership).

1145

| <b>Putative hybrid individuals</b> | <b>Parent 1 Group</b> | <b>Parent 2 Group</b>          | <b>Zscore</b> | <b>P</b> | <b>Gamma</b> |
|------------------------------------|-----------------------|--------------------------------|---------------|----------|--------------|
| Ohar_X_fil_MJM629.6                | CoreOharfil           | CoreOharpub                    | -99999.9      | 1        | -0.049       |
| Ohar_X_fil_MJM628                  | CoreOharfil           | CoreOharpub                    | -99999.9      | 1        | -0.057       |
| Ohar_X_fil_MJM626                  | CoreOharfil           | CoreOharpub                    | -99999.9      | 1        | -0.001       |
| Ohar_X_fil_MJM793                  | CoreOharfil           | CoreOharpub                    | -99999.9      | 1        | -0.057       |
| Ohar_X_fil_MJM794                  | CoreOharfil           | CoreOharpub                    | -99999.9      | 1        | -0.034       |
| Ohar_X_fil_BJC81                   | CoreOharfil           | CoreOharpub                    | -99999.9      | 1        | -0.042       |
| Oharhar_MJM1581                    | CoreOharpub           | Oharhar/harmac                 | -99999.9      | 1        | 1.706        |
| Ohar_X_pub_BJC29                   | CoreOharpub           | Oharhar/harmac                 | 2.378         | 0.009**  | 0.338        |
| Oharpub_BJC30                      | CoreOharpub           | Oharhar/harmac                 | -99999.9      | 1        | -0.215       |
| Oharpub_MJM2158.C                  | CoreOharpub           | Oharhar/harmac                 | 1.113         | 0.133    | 0.229        |
| Ohar_X_pub_MJM1134.2               | CoreOharpub           | Oharhar/harmac                 | 0.043         | 0.483    | 0.015        |
| Ohar_X_pub_MJM2405.A               | CoreOharpub           | Oharhar/harmac                 | 0.882         | 0.189    | 0.158        |
| Ohar_X_pub_MJM594.4                | CoreOharpub           | Oharhar/harmac                 | 2.094         | 0.018*   | 0.332        |
| Ohar_X_pub_MJM615                  | CoreOharpub           | Oharhar/harmac                 | 0.413         | 0.340    | 0.096        |
| Oharmac_MJM997.1                   | CoreOharpub           | Oharhar/harmac                 | 1.563         | 0.059    | 0.224        |
| Ohar_X_har_MJM613                  | CoreOharpub           | Oharhar/harmac                 | -99999.9      | 1        | -0.495       |
| Otub_X_str_MJM1916.E               | Otubtub               | Oharhar/harmac                 | 5.585         | 0.000*** | 0.947        |
| Oharfen_MJM2192.A                  | CoreOharfen           | CoreOharfil                    | 0.305         | 0.380    | 0.001        |
| Oharfen_MJM781.3                   | CoreOharfen           | CoreOharpub                    | 0.025         | 0.490    | 9.69E-05     |
| Ocapcap_MJM1015.2                  | CoreOcapcap           | S. TX Ocapber                  | 0.467         | 0.320    | 0.003        |
| Ocap_X_ber_MJM767.3                | central OK<br>Ocapber | Pecos River/Southern<br>Plains | -99999.9      | 1        | -0.003       |

• Indicates value meets significance threshold of P < 0.05  
 \*\* Indicates value meets significance threshold of P < 0.001  
 \*\*\* Indicates value meets significance threshold of P < 0.0001

1146

1147 S11.

1148 See excel table “S11 Morphometric Data”.

1149 S12.

1150 See excel table “S12 Pollen Counts”.

1151

1152 S13.

1153 ***Oenothera HybSeq CTAB Silica DNA extractions***  
1154 ***b. cooper 11/10/2015***

1155 Adapted from JISA Protocol, J. Fant's Protocol and Sharma and Puohit (2012) for Silica-dried Leaves of *Oenothera*  
1156 *sect. Calylophus*

1157  
1158 **SAMPLE PREPARATION & GRINDING**

- 1159 1. Warm CTAB buffer to 65°C in water bath in the hood and pour liquid nitrogen into dipping canister (You  
1160 will only need a few inches of liquid in the Dewar, make sure to pour it back into the large holding canister  
1161 when you are done to prevent evaporation).
- 1162 2. Put a small volume of 1:1 sterilized sand and 3 metal/ceramic beads into centrifuge tubes, then put tubes  
1163 in freezer (-20) until envelopes are ready.
- 1164 3. Keeping envelopes/leaf tissue on ice to prevent thawing; take envelopes and centrifuge tubes out of  
1165 freezer and weigh/estimate small amount of dried tissue (e.g., 10-50 mg of leaves), put in labeled  
1166 microfuge tubes. After each tube is filled, place tube in freezer.
  - 1167 a. Make sure leaf tissue is broken up into small pieces when adding to ensure full grinding.
  - 1168 b. Keeping tissue frozen prevents phenolic compounds from oxidizing, and enzymes from activating and  
1169 breaking down DNA
  - 1170 c. Follow DNA free lab protocols using bleach to prevent contamination/cross contamination of samples.
- 1171 4. Mix 45 (= .3%) µl 2-mercaptoethanol to 15 ml CTAB buffer in small beaker (enough for ~15  
1172 samples...double for 30 samples, etc.)
  - 1173 a. Mercaptoethanol must be measured and added in the fume hood.
  - 1174 b. CTAB is a detergent that lyses (breaks down) the cell membranes. The PVP in the buffer helps bind the  
1175 polysaccharides and might co-ppt
- 1176 5. Dip tubes in Liquid Nitrogen (or store in -80 for ~30 minutes) and **immediately** Grind tissue **thoroughly** in  
1177 Fast Prep machine (thorough grinding may require 2-4 cycles, re-dip tubes in liquid nitrogen after 2 cycles  
1178 to ensure no thawing occurs).
- 1179 6. **Immediately** after grinding add 600 µl of CTAB/mercaptoethanol buffer to each tube
  - 1180 a. **BE CAREFUL.** It is important to prevent cross-contamination when opening tubes. **Powdered tissue can**  
1181 **spread easily through the air or on your fingers.** Make sure open tubes are spaced apart from one another  
1182 on the tray; open each tube away from other open tubes/caps; and place caps a safe distance from one  
1183 another. Make sure leaf powder is not stuck to your gloves before touching consecutive tubes/caps.
  - 1184 b. Grind on FastPrep for one cycle

1185 **EXTRACTION AND ISOLATION OF DNA (once leaf tissue is well-ground)**

- 1186 1. Incubate tubes for 60 minutes at 60°C on Thermoblock or water bath
  - 1187 a. Shake tubes several times ~ every 10 minutes during incubation (for compacted samples, vortex on high  
1188 setting to ensure mixing)
  - 1189 b. When incubation is complete, turn Thermoblock down to 37°C
- 1190 2. Add 600 µL chloroform-isoamyl (24:1) to tube and vortex on High setting to ensure thorough mixing.
  - 1191 a. **BE CAREFUL.** It is important to prevent cross-contamination at this step when opening/handling tubes.  
1192 Follow steps outlined previously.
  - 1193 b. Chlorophyll and other pigments get transferred into the Cl layer because pigments are non-polar and  
1194 dissolve into the highly non-polar chloroform. The DNA remains in the aqueous layer.
- 1195 3. Spin for 10 min at 9,000 RPM.
  - 1196 a. After spinning, the upper layer of each tube should have a clear liquid: this is where your DNA is.
- 1197 4. Transfer top (clear) liquid to a new (labeled) 1.5 ml eppendorf tube. **Do not be Greedy**, leaving some liquid  
1198 in tube is fine – the important thing is not to pipette **ANY** interphase material.
  - 1199 a. A yield of ~400-500 µL of supernatant is common.
  - 1200 b. If you accidentally disturb the interphase, or believe that you have pipetted interphase, return supernatant to  
1201 microfuge tube and re-centrifuge for 10 min at 9000 rpm. Repeat step 4.

1202 **DNA PRECIPITATION**

- 1203 1. Add 1/10 volume 3M sodium acetate and ½ volume 5M NaCl (i.e. 500ul of solution add 250 ul of NaCl, 50  
1204 ul of Na-Acetate).
- 1205 2. Add 2/3<sup>rd</sup> volume of cold isopropanol (to previous volumes = 500 ul isop)
  - 1206 a. Isopropanol is heavy alcohol so allows DNA ppt with lower volume

- 1207 3. Mix & store in -20°C (freezer) for 1-2 hours  
1208 **(NOTE: POTENTIAL STOPPING POINT FOR A DAY OR MORE...SAMPLES CAN STAY AT -20°C FOR DAYS)**  
1209 4. Spin for 3 min at **10K-12K RPM.**  
1210 5. Decant the supernatant & drain; make sure pellet stays at bottom of tube.  
1211 a. Pellets are usually white but sometimes they can even be brown, this is not necessarily a problem.  
1212 6. Wash pellet with 500ul of 70% EtOH & flick tubes to dislodge pellet from bottom, then vortex on high to  
1213 clean.  
1214 7. Spin for 3 min at 10K-12K RPM.  
1215 8. Decant the supernatant making sure pellet stays at bottom of tube  
1216 9. Leave tubes open and place tubes on Speedvac (vacuum on -2.5, heat = low, spin) for ~20 minutes or until  
1217 all EtOH has evaporated.  
1218 a. If pellets are not dry after 20 minutes, check frequently to prevent over drying which makes the pellet  
1219 difficult to re-suspend.  
1220 b. Alternatively, can air dry on thermoblock  
1221 **(NOTE: POTENTIAL STOPPING POINT ...SAMPLES CAN STAY AT 20°C FOR DAYS – place in cupboard but cover with kimwipe)**  
1222 **FINAL CLEANING & RESUSPENSION OF DNA**  
1223 1. Add 500 ul of 0.5 mL High Salt TE Buffer and close lids  
1224 2. Incubate tubes on Thermoblock at 37-50°C (45) until pellet dissolves (15-30 minutes);  
1225 a. Vortex frequently if this is taking a long time  
1226 **(NOTE: POTENTIAL STOPPING POINT FOR A DAY OR MORE...SAMPLES CAN STAY AT -20°C FOR DAYS)**  
1227 3. Add 3 volumes of binding buffer (3 volumes for every 1 volume DNA pellet = ~100-150 ul BB), **let stand for**  
1228 **20 minutes**  
1229 4. Centrifuge at 550 g for 10 min  
1230 5. transfer supernatant to clean 2ml eppi tube leaving any colored or gelatinous precipitate behind.  
1231 6. Add 300 µl of silica suspension and mix for 30 minutes by regular and frequent gentle inversion  
1232 7. Centrifuge at 550 g for 10 minutes, discard supernatant  
1233 8. Re-suspend silica pellet in 1.5 mL of wash buffer 1  
1234 9. Centrifuge at 3000 g for 15 seconds, decant supernatant  
1235 10. Re-suspend silica pellet in 1.5 mL of wash buffer 2  
1236 11. Centrifuge at 3000 g for 15 seconds, decant supernatant, dry pellet completely on speed vac  
1237 12. suspend silica pellet in 300 ul TE buffer, incubate at 50° mixing regularly by vortex  
1238 13. centrifuge at 11600 g for 1 min. then transfer supernatant into clean 1.5 mL eppi tube.  
1239 14. Precipitate DNA by adding 50 ul of 3M sodium Acetate and 500 uL 100% Etoh  
1240 15. Store at -20° C for at least 2 hours  
1241 **(NOTE: POTENTIAL STOPPING POINT FOR A DAY OR MORE...SAMPLES CAN STAY AT -20°C FOR DAYS)**  
1242 16. Centrifuge at 11600 g for 5 min, discard supernatant, dry pellet on speed vac  
1243 17. Dissolve in 50 uL 1X TE buffer (it may not look like there is anything in the tube at this point, but there is  
1244 lots of pure DNA in there! Add the TE buffer)  
1245 18. Store in -20°C (freezer)  
1246 19. In rare circumstances that an extraction still has coloration at this stage (yellow or brown usually) you can  
1247 now put it through a Qiagen Qiaquick spin column or other proprietary cleanup column to further purify  
1248 the DNA.  
1249  
1250 **REAGENTS (recipes below) and SUPPLIES**  
1251 • CTAB buffer (in glass container in refrigerator)  
1252 • Liquid Nitrogen  
1253 • 2-mercaptoethanol (in fume hood with gloves)  
1254 • 24:1Chloroform:isoamyl alcohol - glass container in fumehood use gloves and keep in hood -(Or 25:24:1  
1255 phenol-chloroform:isoamyl)  
1256 • 5M Nacl  
1257 • 3M M sodium acetate  
1258 • Isopropanol and 70% and 100% EtOH  
1259 • High Salt TE buffer  
1260 • Binding Buffer



- 1261       • Silica Matrix  
1262       • Wash Buffer 1  
1263       • Wash Buffer 2  
1264       • 1X TE buffer  
1265       • 1.5 ml eppi tubes  
1266       • 2 ml eppi tubes  
1267
- 1268       **CTAB BUFFER** [100 mM Tris-HCl (pH=8.0), 1.4 M NaCl, 20 mM EDTA, 2% (or 4%) CTAB  
1269 (hexadecyltrimethylammonium bromide), 2% PVP-40 (polyvinylpyrrolidone, m.w. 40000), + 0.3% β-  
1270 mercaptoethanol (add in fume hood in a beaker to a premeasured volume of CTAB buffer required for the number  
1271 of extractions planned plus one).]  
1272
- 1273       For 200 mL CTAB buffer 2% (4%):  
1274       20 ml 1M Tris-Cl  
1275       1.4 M NaCl (16.36 g NaCl)  
1276       • The addition of NaCl at concentrations higher than 0.5 M, along with CTAB, is known to remove  
1277       polysaccharides during DNA extraction  
1278       8 ml 0.5 M EDTA  
1279       4 g CTAB (8 g for 4%)  
1280       4 g PVP-40  
1281       ~120 ml dH<sub>2</sub>O, then fill to 200 mL  
1282
- 1283       **TE buffer:** [10 mM Tris-HCl (pH=8.0), 1 mM EDTA.]
- 1284       10 mL 1 M Tris-HCl  
1285       2 ml 0.5 M EDTA  
1286       982 ml dH<sub>2</sub>O  
1287
- 1288       **High Salt TE Buffer:** [10 mM Tris-HCl (pH=8.0), 1 mM EDTA, 1M NaCl.]  
1289       10 ml 1 M Tris-HCl  
1290       2 ml 0.5 M EDTA  
1291       200 ml 5M NaCl  
1292       788 ml dH<sub>2</sub>O  
1293
- 1294       **Binding Buffer:** [50mM Tris (pH7.5), 6M NaClO<sub>4</sub>, 1mM EDTA]  
1295       For 200 ml:  
1296       10mL Tris  
1297       168.552 g NaClO<sub>4</sub>  
1298       400 ul EDTA  
1299       top off to 200 mL with dH<sub>2</sub>O  
1300
- 1301       **Wash Buffer 1:** [3 volumes binding buffer, 1 volume water]  
1302       For 60 samples:  
1303       90 ml Binding Buffer  
1304       30 ml dH<sub>2</sub>O  
1305
- 1306       **Wash Buffer 2:** [1 volume 40 mM Tris (pH 8.0), 4 mM EDTA, 0.8 M NaCl, 1 Volume ethanol]  
1307       For 60 samples:  
1308       1.8 ml 1M tris  
1309       360 ul .5M EDTA  
1310       7.2 ml 5M NaCl

- 1311 35.64 ml dh20  
1312 45 ml 100% etoh  
1313  
1314 **24:1 Chloroform: Isoamyl**  
1315 240ml Chloroform  
1316 10ml Isoamyl alcohol  
1317  
1318 25:24:1 Chloroform: Isoamyl Saturated with 10 mM Tris, pH 8.0, 1 mM EDTA. – Purchase to ensure right pH  
1319 250ml Phenol  
1320 240ml Chloroform  
1321 10ml Isoamyl alcohol  
1322  
1323 **Silica suspension (use lab grade silicon dioxide 99%)**  
1324 1. Suspend silicon dioxide powder in ~20 volumes of water (50 ml : 1L)  
1325 a. use magnetic stirring rod to bring silica into uniform suspension  
1326 2. Decant suspension into clean beaker leaving behind heavy sediment at bottom  
1327 (discard this)  
1328 3. Allow suspension to settle by gravity for 2-3 hours  
1329 4. Decant and discard supernatant with fine material keeping silicon dioxide that  
1330 has settled  
1331 5. Re-suspend silicon dioxide in dH2O, repeating step until fine particles removed  
1332 (2-3X total is good)  
1333 a. use magnetic stirring rod to bring silica into uniform suspension  
1334 6. Re-suspend silicon dioxide in dH2O and transfer to 15 ml falcon tubes  
1335 7. Collect silicon dioxide by low speed centrifugation (up to 3200 rpm for 3 min)  
1336 8. Add ~15 ml of 10% bleach solution to each aliquot and mix frequently by  
1337 inversion/vortexing for 15-30 minutes  
1338 9. Re-suspend diatomite in dH2O by vortexing, then centrifuge at low speed for 3  
1339 minutes to pellet  
1340 10. Discard supernatant  
1341 11. Repeat step 9 and 10 two more times  
1342 12. Re-suspend in dH2O and autoclave  
1343 13. Re-suspend silica dioxide pellet in 1 volume PCR grade DNA/RNA free H2O  
1344 14. Aliquot into 1.5 ml eppi tubes and store at 4° C  
1345 15. Vortex thoroughly to bring silica into uniform suspension before using  
1346  
1347  
1348  
1349  
1350  
1351  
1352  
1353  
1354  
1355  
1356  
1357  
1358  
1359  
1360

1361 S14.

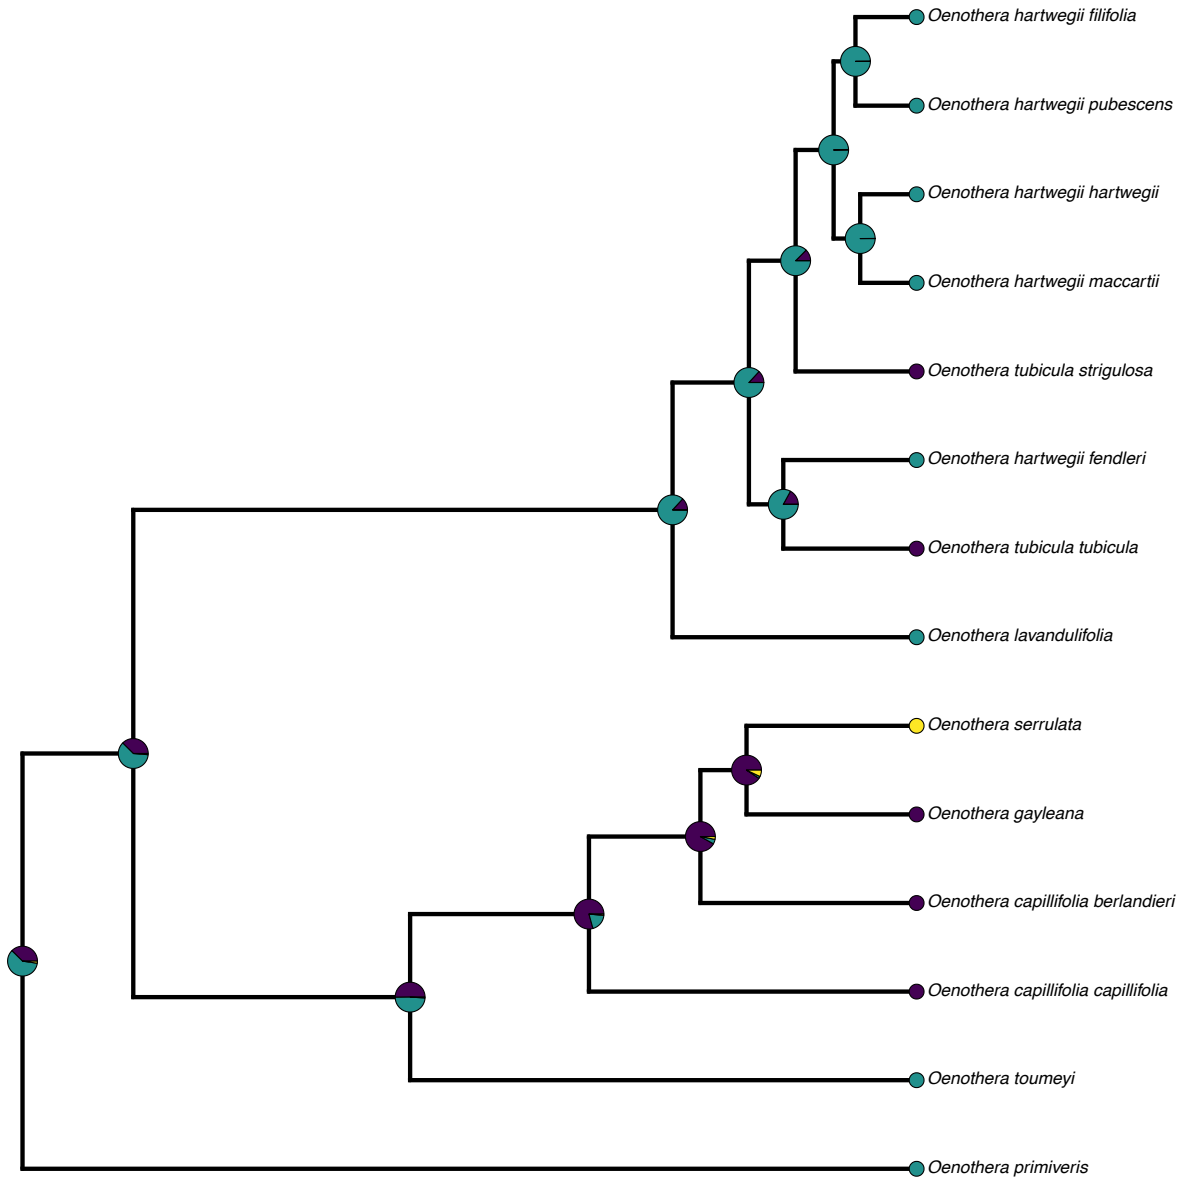

1362  
1363 Ancestral State Reconstruction of reproductive system in sect. *Calylophus* using supercontigs  
1364 and accessions grouped into taxa. Pie-charts on nodes represent likelihood of ancestral  
1365 reproductive system at each node (teal = hawkmoth pollination, purple = bee pollination, yellow  
1366 = PTH).  
1367
